# Supplementary material for: Bayesian compositional regression with microbiome features via variational inference
Source: Springer Nature journal article supplement (doi:10.1186/s12859-023-05219-x), 2023-05-22
Supplement: 12859_2023_5219_MOESM1_ESM.pdf [file 12859_2023_5219_MOESM1_ESM.pdf]

Bayesian compositional regression with microbiome  
features via variational inference

Supplementary Material

DARREN A. V. SCOTT<sup>1</sup> and ALEX LEWIN<sup>1</sup>

<sup>1</sup>*London School of Hygiene and Tropical Medicine, London, UK*

# Contents

- 1 CAVI-MC Updates 3**
  - 1.1 Parametrisation . . . . . 3
  - 1.2 CAVI Updates . . . . . 6
  - 1.3 Pseudo Updates . . . . . 25
  - 1.4 ELBO . . . . . 29
  
- 2 RJMCMC moves and model proposals 37**
  - 2.1 Birth-death and swap moves . . . . . 38
  - 2.2 Within-model moves . . . . . 40
  
- 3 Proofs 41**
  - 3.1 Proof: Simplification of the constraint matrix . . . . . 41
  - 3.2 Proof: Eigenvalues of the constraint matrix . . . . . 43
  - 3.3 Proof: Pseudo Inverse of the constraint matrix . . . . . 44
  
- 4 Tables 46**
  
- 5 Figures 50**

# 1 CAVI-MC Updates

This section contains all of the variation inference updates for the CAVI-MC.

## 1.1 Parametrisation

The full prior parametrisation is defined below. The likelihood and first level parameters are:

$$p(\mathbf{y}|\cdot) = (2\pi\sigma^2)^{-n/2} \exp\left(-\frac{1}{2\sigma^2} \|\mathbf{y} - \mathbf{1}_n\alpha - \mathbf{X}\boldsymbol{\beta} - \mathbf{W}\boldsymbol{\zeta} - \mathbf{Z}\boldsymbol{\theta}\|^2\right) \quad y \in \mathbb{R}^n \quad (1.1)$$

$$p(\alpha|w_\alpha) = (2\pi w_\alpha)^{-1/2} \exp\left(-\frac{1}{2w_\alpha} \alpha^2\right) \quad (1.2)$$

$$p(\beta_s|\gamma_s, w) = \left[ (2\pi)^{-1/2} (w)^{-1/2} \exp\left\{-\frac{1}{2w} \|\beta_s\|^2\right\} \right]^{\gamma_s} \delta_0(\beta_s)^{1-\gamma_s} \quad \beta_s \in \mathbb{R}^1 \quad (1.3)$$

$$p(\gamma_s|\omega) = \omega^{\gamma_s} (1-\omega)^{1-\gamma_s} \quad \gamma_s \in \{0, 1\} \quad (1.4)$$

$$p(\boldsymbol{\theta}|\cdot) = \frac{1}{\det^*(2\pi\mathbf{T}_\xi D(\boldsymbol{\psi}_\xi)\mathbf{T}_\xi^T)^{(1/2)}} \exp\left(-\frac{1}{2}(\boldsymbol{\theta}_\xi)^T(\mathbf{T}_\xi D(\boldsymbol{\psi}_\xi)\mathbf{T}_\xi^T)^+(\boldsymbol{\theta}_\xi)\right) \delta_0(\boldsymbol{\theta}_\xi) \quad (1.5)$$

$$p(\boldsymbol{\psi}|\boldsymbol{\xi}) = \prod_{j=1}^d \left[ \frac{b_\psi^{a_\psi}}{\Gamma(a_\psi)} (\psi_j)^{-a_\psi-1} \exp\{-b_\psi\psi_j^{-1}\} \right]^{\xi_j} \delta_0(\psi_j)^{1-\xi_j} \quad \psi_j > 0, \forall j \quad (1.6)$$

$$p(\boldsymbol{\zeta}_g|\chi_g, \nu) = \left( \frac{1}{(2\pi\nu)^{m_g/2}} \exp\left(-\frac{1}{2\nu} \boldsymbol{\zeta}_g^T \boldsymbol{\zeta}_g\right) \right)^{\chi_g} \delta_0(\boldsymbol{\zeta}_g)^{1-\chi_g} \quad (1.7)$$

$$p(\chi_g|\varrho) = \varrho^{\chi_g} (1-\varrho)^{1-\chi_g} \quad (1.8)$$

$$p(\sigma^2|\tau, \nu) = \frac{\nu^\tau}{\Gamma(\tau)} (\sigma^2)^{-\tau-1} \exp\{-\nu\sigma^{-2}\} \quad \sigma^2 > 0 \quad (1.9)$$

The hyperparameters are:

$$p(w_\alpha|a_\alpha, b_\alpha) = \frac{b_\alpha^{a_\alpha}}{\Gamma(a_\alpha)}(w_\alpha)^{-a_\alpha-1} \exp\{-b_\alpha w_\alpha^{-1}\} \quad w > 0 \quad (1.10)$$

$$p(b_\alpha) = \frac{b_\alpha^{a_\alpha}}{\Gamma(a_\alpha)}(b_\alpha^{a_\alpha-1}) \exp\{-b_\alpha b_\alpha\} \quad b_\alpha > 0 \quad (1.11)$$

$$p(\omega|a_\omega, b_\omega) = \frac{1}{B(a_\omega, b_\omega)}\omega^{a_\omega-1}(1-\omega)^{b_\omega-1} \quad 0 \leq \omega \leq 1 \quad (1.12)$$

$$p(w|a_w, b_w) = \frac{b_w^{a_w}}{\Gamma(a_w)}(w)^{-a_w-1} \exp\{-b_w w^{-1}\} \quad w > 0 \quad (1.13)$$

$$p(b_w) = \frac{b_w^{a_w}}{\Gamma(a_w)}(b_w^{a_w-1}) \exp\{-b_w b_w\} \quad b_w > 0 \quad (1.14)$$

$$p(\nu) = \frac{b_\nu^{a_\nu}}{\Gamma(a_\nu)}(\nu^{a_\nu-1}) \exp\{-\nu b_\nu\} \quad (1.15)$$

$$p(\boldsymbol{\xi}) \propto \prod_{j=1}^d \kappa^{\xi_j} (1-\kappa)^{1-\xi_j} \mathbf{I} \left[ \sum_j \xi_j \neq 1 \right] \quad (1.16)$$

$$p(\kappa) = \frac{1}{B(a_\kappa, b_\kappa)}\kappa^{a_\kappa-1}(1-\kappa)^{b_\kappa-1} \quad 0 \leq \kappa \leq 1 \quad (1.17)$$

$$p(\varrho) = \frac{1}{B(a_\varrho, b_\varrho)}\varrho^{a_\varrho-1}(1-\varrho)^{b_\varrho-1} \quad 0 \leq \varrho \leq 1 \quad (1.18)$$

$$p(v|a_v, b_v) = \frac{b_v^{a_v}}{\Gamma(a_v)}(w)^{-a_v-1} \exp\{-b_v v^{-1}\} \quad v > 0 \quad (1.19)$$

$$p(b_v) = \frac{b_{bv}^{a_{bv}}}{\Gamma(a_{bv})}(b_v^{a_{bv}-1}) \exp\{-b_{bv} b_v\} \quad b_v > 0 \quad (1.20)$$

The prior parametrisation is defined above, where the indexes  $s, j, g$  assign unique variables per index where as  $\alpha, \lambda, \tau$  and  $b$  assign single parameters. The design matrix  $\mathbf{X}$  contains the continuous covariates,  $\mathbf{W}$  contains the categorical covariates as dummy variables with reference to an intercept and  $\mathbf{Z}$  contains the log microbiome data.

By imposing a constraint on  $\theta$  we introduce a covariance between the elements  $\theta_j$  which

we capture within the mean field family. The joint posterior is

$$\begin{aligned}
p(\mathbf{y}, \boldsymbol{\vartheta}) = & p(\mathbf{y}|\cdot) \times \left\{ \prod_s p(\beta_s|w, \gamma_s) \times \prod_s p(\gamma_s|\omega) \right\} \times \left\{ \prod_g p(\zeta_g, \chi_g) \times p(\chi_g|\varrho) \right\} \\
& \left\{ p(\boldsymbol{\theta}|\Sigma(\mathbf{T}, \boldsymbol{\psi}), \boldsymbol{\xi}) \times p(\boldsymbol{\psi}|\boldsymbol{\xi}) \times p(\boldsymbol{\xi}) \right\} \times p(\alpha|w_\alpha) \times p(w_\alpha|b_\alpha) \times p(b_\alpha) \\
& p(\omega) \times p(\kappa) \times p(\varrho) \times p(\sigma^2|\tau, \nu) \times p(w|b_w) \times p(b_w) \times p(\nu) \times p(v|b_v) \times p(b_v)
\end{aligned}$$

Define the mean-field approximation distribution as

$$\begin{aligned}
q(\boldsymbol{\vartheta}) = & q(\alpha) \times \left\{ \prod_s q(\beta_s, \gamma_s) \right\} \times \left\{ \prod_g q(\zeta_g, \chi_g) \right\} \times q(\boldsymbol{\theta}, \boldsymbol{\psi}, \boldsymbol{\xi}) \times q(\omega) \times q(\kappa) \times q(\varrho) \times \\
& q(\sigma^2) \times q(w_\alpha) \times q(w) \times q(v) \times q(b_\alpha) \times q(b_w) \times q(b_v) \times q(\nu) \times q(\tau)
\end{aligned}$$

with  $f(\boldsymbol{\vartheta})^{(j)}$  as the  $j$ -th moment of  $f(\boldsymbol{\vartheta})$  with respect to  $q(\boldsymbol{\vartheta})$ ,  $\mathbb{E}_q[f(\boldsymbol{\vartheta})^j]$ .

By defining a block in the mean field approximation as a multivariate density  $q(\theta, \xi)$ , this allows us to incorporate correlation between the elements in  $\theta$  (and the corresponding elements in  $\xi$ ) related to the compositional explanatory variables and the correlation between  $\theta_j$  and  $\xi_j$ . Now the expectation is with respect to the vector.

## 1.2 CAVI Updates

The CAVI update is proportional to

$$\begin{aligned}
\log q(\alpha) &\propto \mathbb{E}_{(-\alpha)} [\log p(\mathbf{y}|\cdot) + \log p(\alpha|w_\alpha)] \\
&\propto \mathbb{E}_{(-\alpha)} \left[ -\frac{1}{2\sigma^2} \left\| \mathbf{y} - \alpha \mathbf{1}_n - \sum_s X_s \gamma_s \beta_s - \sum_j Z_j \xi_j \theta_j - \sum_g W_g \chi_g \zeta_g \right\|^2 + \right. \\
&\quad \left. + \frac{1}{2} \log(w_\alpha^{-1}) - \frac{\alpha^2}{2w_\alpha} \right] \\
&\propto -\frac{\alpha^2}{2(w_\alpha)^{(1)}} - \frac{1}{2(\sigma^2)^{(1)}} \left( \alpha^2 n - 2\alpha \mathbf{1}_n^T \mathbf{y} + \right. \\
&\quad \left. - 2\alpha \mathbf{1}_n^T \sum_s X_s (\beta_s)^{(1)} - 2\alpha \mathbf{1}_n^T \sum_j Z_j (\theta_j)^{(1)} - 2\alpha \mathbf{1}_n^T \sum_g W_g (\zeta_g)^{(1)} \right).
\end{aligned}$$

By exponentiating and completing the square we have

$$q(\alpha) = N(\mu_\alpha, \sigma_\alpha^2)$$

with updates

$$\mu_\alpha = \sigma_\alpha^2 \left[ (\sigma^{-2})^{(1)} \mathbf{1}_n^T \left( \mathbf{y} - \sum_s X_s (\beta_s)^{(1)} - (\mathbf{Z}_\xi \boldsymbol{\theta}_\xi)^{(1)} - \sum_g \mathbf{W}_g (\zeta_g)^{(1)} \right) \right] \quad (1.21)$$

$$\sigma_\alpha^2 = \left( n(\sigma^{-2})^{(1)} + (w_\alpha^{-1})^{(1)} \right)^{-1} \quad (1.22)$$

$$\begin{aligned}
\log q(\beta_s, \gamma_s) &= \mathbb{E}_{(\beta_s, \gamma_s)} \left[ \log p(\mathbf{y}|\cdot) + \log p(\beta_s | \gamma_s, w) + \log p(\gamma_s | w_s) \right] + cst \\
&= \mathbb{E}_{(\beta_s, \gamma_s)} \left[ -\frac{1}{2\sigma^2} \left\| \mathbf{y} - \alpha \mathbf{1}_n - \sum_{k \neq s} X_k \beta_k - X_s \beta_s - \mathbf{Z} \boldsymbol{\theta} - \sum_g \mathbf{W}_g \zeta_g \right\|^2 - \frac{\gamma_s \beta_s^2}{2w} + \right. \\
&\quad \left. + \gamma_s \log(2\pi w)^{-1/2} + \gamma_s \log(w) + (1 - \gamma_s)(\log(1 - w)) \right] + cst
\end{aligned}$$

where  $cst$  is a constant with respect to  $\beta_s$  and  $\gamma_s$ . The spike-and-slab prior forces the latent selection variables into the likelihood component

$$\begin{aligned}
\log(\beta_s, \gamma_s) &= \mathbb{E}_{(\beta_s, \gamma_s)} \left[ -\frac{1}{2\sigma^2} \left( \|X_s\|^2 \gamma_s \beta_s^2 + 2X_s^T \gamma_s \beta_s \sum_{k \neq s} X_k \gamma_k \beta_k - 2X_s^T \gamma_s \beta_s \mathbf{y} + \right. \right. \\
&\quad \left. \left. + 2X_s^T \gamma_s \beta_s \mathbf{Z}_\xi \boldsymbol{\theta}_\xi + 2X_s^T \gamma_s \beta_s \mathbf{1}_n \alpha + 2\gamma_s \beta_s X_s^T \sum_g \mathbf{W}_g \boldsymbol{\zeta}_g \chi_g \right) - \frac{\gamma_s \beta_s^2}{2w} + \right. \\
&\quad \left. + \gamma_s \log(2\pi w)^{-1/2} + \gamma_s \log(w) + (1 - \gamma_s)(\log(1 - \omega)) \right] + cst \\
&= -\frac{\gamma_s \beta_s^2}{2} \left( \frac{\|X_s\|^2}{(\sigma^2)^{(1)}} + \frac{1}{(w)^{(1)}} \right) + \gamma_s \beta_s \left( \frac{X_s^T}{(\sigma^2)^{(1)}} \left[ \sum_{k \neq s} X_k (\beta_k)^{(1)} - \mathbf{y} + (\mathbf{Z}_\xi \boldsymbol{\theta}_\xi)^{(1)} + \right. \right. \\
&\quad \left. \left. + \mathbf{1}_n (\alpha)^{(1)} + \sum_g \mathbf{W}_g (\boldsymbol{\zeta}_g)^{(1)} \right] \right) + \gamma_s \left( \frac{\log((w)^{(1)})}{2} + (\log \omega)^{(1)} - \frac{\log(2\pi)}{2} \right) + \\
&\quad + (1 - \gamma_s)((\log(1 - \omega))^{(1)} + \delta_0(\beta_s)) + cst
\end{aligned}$$

By exponentiating and completing the square we arrive at

$$\begin{aligned}
q(\beta_s, \gamma_s | \mathbf{y}) &= \left[ (2\pi \sigma_{\beta,s}^2)^{-\frac{1}{2}} \exp \left\{ -\frac{1}{2\sigma_{\beta,s}^2} (\beta_s - \mu_{\beta,s})^2 \right\} \right]^{\gamma_s} \times \tag{1.23} \\
&\quad \times \left[ \left\{ \exp((\log w^{-1})^{(1)}) \sigma_{\beta,s}^2 \right\}^{\frac{1}{2}} \exp \left\{ \frac{1}{2} \mu_{\beta,s} \sigma_{\beta,s}^{-2} \right\} \exp \{ (\log \omega)^{(1)} \} \right]^{\gamma_s} \times \\
&\quad \times \delta_0(\beta_s)^{1-\gamma_s} \exp \{ (\log 1 - \omega)^{(1)} \}^{1-\gamma_s}
\end{aligned}$$

With updates

$$\sigma_{\beta,s}^2 = [\|X_s\|^2 (\sigma^{-2})^{(1)} + (w^{-1})^{(1)}]^{-1} \tag{1.24}$$

$$\begin{aligned}
\mu_{\beta,s} &= \sigma_{\beta,s}^2 X_s^T \left[ (\sigma^{-2})^{(1)} \left( \mathbf{y} - (\alpha)^{(1)} \mathbf{1}_n - \sum_{k \neq s} X_k (\beta_k)^{(1)} - (\mathbf{Z}_\xi \boldsymbol{\theta}_\xi)^{(1)} - \sum_g \mathbf{W}_g (\boldsymbol{\zeta}_g)^{(1)} \right) \right] \\
&= \sigma_{\beta,s}^2 (\sigma^{-2})^{(1)} X_s^T (\mathbf{u}_{-s})^{(1)} \tag{1.25}
\end{aligned}$$

and thus by calling

$$(\gamma_s)^{(1)} = \left[ 1 + \sqrt{\sigma_{\beta,s}^{-2}} \exp \left\{ (\log 1 - \omega)^{(1)} - (\log \omega)^{(1)} - \frac{1}{2} (\log w^{-1})^{(1)} - \frac{1}{2} \mu_{\beta,s}^2 \sigma_{\beta,s}^{-2} \right\} \right]^{-1} \quad (1.26)$$

we have under  $q$

$$\begin{aligned} q(\beta_s | \gamma_s = 1, y) &= \mathcal{N}(\mu_{\beta,s}, \sigma_{\beta,s}^2), & q(\beta_s | \gamma_s = 0, y) &= \delta_0(\beta_s) \\ q(\gamma_s | y) &= \text{Bern}(\gamma_s^{(1)}). \end{aligned}$$

Note that now

$$(\beta_s)^{(1)} = \mu_{\beta,s}(\gamma_s)^{(1)} \quad (1.27)$$

$$(\beta_s)^{(2)} = (\sigma_{\beta,s}^2 + \mu_{\beta,s}^2)(\gamma_s)^{(1)}. \quad (1.28)$$

---

The index  $g$  denotes the categorical factor groupings  $g = 1, \dots, G$  and  $m_g$  is the dimension of the vector  $\boldsymbol{\zeta}_g$ . As the categorical factors are coded with reference to the intercept,  $m_g$  is always 1 less than the levels in the categorical factor.

$$\begin{aligned} \log q(\boldsymbol{\zeta}_g, \chi_g) &= \mathbb{E}_{(\zeta_g, \chi_g)} \left[ \log p(\mathbf{y} | \cdot) + \log p(\boldsymbol{\zeta}_g | \chi_g, v) + \log p(\chi_g | \varrho) \right] + cst \\ &= \mathbb{E}_{(\zeta_g, \chi_g)} \left[ -\frac{1}{2\sigma^2} \left\| \mathbf{y} - \alpha \mathbf{1}_n - \mathbf{X}\boldsymbol{\beta} - \sum_{k \neq g} \mathbf{W}_k \boldsymbol{\zeta}_k - \mathbf{W}_g \boldsymbol{\zeta}_g - \mathbf{Z}\boldsymbol{\theta} \right\|^2 - \frac{\chi_g \boldsymbol{\zeta}_g^T \boldsymbol{\zeta}_g}{2v} \right. \\ &\quad \left. + \chi_g \log(2\pi v)^{-1/2} + \chi_g \log(\varrho) + (1 - \chi_g)(\log(1 - \varrho)) \right] + cst \end{aligned}$$

where  $cst$  is a constant with respect to  $\boldsymbol{\zeta}_g$  and  $\chi_g$ . The spike-and-slab prior forces the



latent selection variables into the likelihood component

$$\begin{aligned}
\log(\boldsymbol{\zeta}_g, \chi_g) &= \mathbb{E}_{(\boldsymbol{\zeta}_g, \chi_g)} \left[ -\frac{1}{2\sigma^2} \left( \chi_g \boldsymbol{\zeta}_g^T \mathbf{W}_g^T \mathbf{W}_g \boldsymbol{\zeta}_g - 2\chi_g \boldsymbol{\zeta}_g^T \mathbf{W}_g^T (\mathbf{y} - \alpha \mathbf{1}_n - \sum_s X_s \gamma_s \beta_s + \right. \right. \\
&\quad \left. \left. - \mathbf{Z}_\xi \boldsymbol{\theta}_\xi - \sum_k \mathbf{W}_k \boldsymbol{\zeta}_k \chi_k) - \frac{\chi_g \boldsymbol{\zeta}_g^T \boldsymbol{\zeta}_g}{2v} + \chi_g \log(2\pi v)^{-m_g/2} + \chi_g \log(\varrho) + \right. \right. \\
&\quad \left. \left. + (1 - \chi_g)(\log(1 - \varrho)) \right] + cst \\
&= \chi_g \left( \frac{-m_g}{2} (\log 2\pi) - \frac{1}{2} \left( \frac{1}{(v)^{(1)}} \boldsymbol{\zeta}_g^T \boldsymbol{\zeta}_g + \frac{1}{(\sigma^2)^{(1)}} \boldsymbol{\zeta}_g^T \mathbf{W}_g^T \mathbf{W}_g \boldsymbol{\zeta}_g + \right. \right. \\
&\quad \left. \left. - 2 \frac{1}{(\sigma^2)^{(1)}} \boldsymbol{\zeta}_g^T \mathbf{W}_g^T (\mathbf{u}_{-g})^{(1)} \right) + \chi_g (\log \varrho)^{(1)} + \frac{m_g}{2} (\log v^{-1})^{(1)} + \right. \\
&\quad \left. + (1 - \chi_g)(\log(1 - \varrho))^{(1)} + \delta_0(\boldsymbol{\zeta}_g) + cst \right.
\end{aligned}$$

defining

$$\Sigma_{\zeta_g} = [(\sigma^{-2})^{(1)} \mathbf{W}_g^T \mathbf{W}_g + (v^{-1})^{(1)} \mathbf{I}_{m_g}]^{-1} \quad (1.29)$$

$$\boldsymbol{\mu}_{\zeta_g} = (\sigma^{-2})^{(1)} \Sigma_{\zeta_g} \mathbf{W}_g^T (\mathbf{u}_{-g})^{(1)} \quad (1.30)$$

by exponentiating, completing the square we have

$$\begin{aligned}
q(\boldsymbol{\zeta}_g, \chi_g) &= \left[ \frac{1}{(2\pi)^{m_g/2}} \det(\Sigma_{\zeta_g})^{-1/2} \exp \left\{ -\frac{1}{2} (\boldsymbol{\zeta}_g - \boldsymbol{\mu}_{\zeta_g})^T \Sigma_{\zeta_g}^{-1} (\boldsymbol{\zeta}_g - \boldsymbol{\mu}_{\zeta_g}) \right\} \right]^{\chi_g} \times \delta_0(\boldsymbol{\zeta}_g)^{1-\chi_g} \\
&\quad \left[ \exp \left( \frac{1}{2} \boldsymbol{\mu}_{\zeta_g}^T \Sigma_{\zeta_g}^{-1} \boldsymbol{\mu}_{\zeta_g} + \frac{1}{2} \log \det(\Sigma_{\zeta_g}) + \frac{m_g}{2} (\log v^{-1})^{(1)} + (\log \varrho)^{(1)} \right) \right]^{\chi_g} \times \\
&\quad \left[ \exp((\log(1 - \varrho))^{(1)}) \right]^{1-\chi_g},
\end{aligned}$$

and thus by calling

$$(\chi_g)^{(1)} = \left[ 1 + \exp \left( (\log 1 - \varrho)^{(1)} - (\log \varrho)^{(1)} - \frac{m_g}{2} (\log v^{-1})^{(1)} - \frac{1}{2} \boldsymbol{\mu}_{\zeta_g}^T \Sigma_{\zeta_g}^{-1} \boldsymbol{\mu}_{\zeta_g} + \right. \right. \\ \left. \left. - \frac{1}{2} \log(\det(\Sigma_{\zeta_g})) \right) \right]^{-1}$$

we have under  $q$

$$q(\boldsymbol{\zeta}_g | \chi_g = 1, y) = \mathcal{N}_{m_g}(\boldsymbol{\mu}_{\zeta_g}, \Sigma_{\zeta_g}), \quad q(\boldsymbol{\zeta}_g | \chi_g = 0, y) = \delta_0(\boldsymbol{\zeta}_g) \\ q(\chi_g | y) = \text{Bern}((\chi_g)^{(1)}).$$

Note that now

$$(\boldsymbol{\zeta}_g)^{(1)} = \boldsymbol{\mu}_{\zeta}(\chi_g)^{(1)} \tag{1.31}$$

$$(\boldsymbol{\zeta}_g^T \boldsymbol{\zeta}_g)^{(1)} = (\text{tr}(\Sigma_{\zeta_g}) + \boldsymbol{\mu}_{\zeta_g}^T \boldsymbol{\mu}_{\zeta_g})(\chi_g)^{(1)} \tag{1.32}$$

$$(\boldsymbol{\zeta}_g^T \mathbf{W}_g^T \mathbf{W}_g \boldsymbol{\zeta}_g)^{(1)} = (\text{tr}(\mathbf{W}_g \Sigma_{\zeta_g} \mathbf{W}_g^T) + \boldsymbol{\mu}_{\zeta_g}^T \mathbf{W}_g^T \mathbf{W}_g \boldsymbol{\mu}_{\zeta_g})(\chi_g)^{(1)} \tag{1.33}$$

---


$$\log q(\boldsymbol{\theta}, \boldsymbol{\psi}, \boldsymbol{\xi} | \cdot) = \mathbb{E}_{(\boldsymbol{\theta}, \boldsymbol{\psi}, \boldsymbol{\xi})} \left[ \log p(\mathbf{y} | \cdot) + \log p(\boldsymbol{\theta} | \boldsymbol{\psi}, \boldsymbol{\xi}) + \log p(\boldsymbol{\psi} | \boldsymbol{\xi}) + \log p(\boldsymbol{\xi}) \right] + cst$$

$$\begin{aligned}
\log q(\boldsymbol{\theta}, \boldsymbol{\psi}, \boldsymbol{\xi}|\cdot) \propto & \mathbb{E}_{-(\xi, \psi, \theta)} \left[ -\frac{1}{2} \left( \boldsymbol{\theta}_\xi^T (\mathbf{T}_\xi D(\boldsymbol{\psi}_\xi) \mathbf{T}_\xi)^+ \boldsymbol{\theta}_\xi + \sigma^{-2} \left\| \mathbf{y} - \alpha \mathbf{1}_n - \mathbf{X} \boldsymbol{\beta} - \mathbf{Z}_\xi \boldsymbol{\theta}_\xi + \right. \right. \right. \\
& \left. \left. \left. - \mathbf{W} \boldsymbol{\zeta} \right\|^2 \right) - \frac{1}{2} (d_\xi - 1) \log(2\pi) - \frac{1}{2} \log(\det^*(\mathbf{T}_\xi D(\boldsymbol{\psi}_\xi) \mathbf{T}_\xi)) \right]_{[I(\sum_j \theta_j = 0)]} + \quad (1.34) \\
& + \mathbb{E}_{-(\xi, \psi, \theta)} \left[ \sum_j \left( \xi_j \log(\kappa) + (1 - \xi_j) \log(1 - \kappa) \right) + \log \delta(\theta_{\bar{\xi}}) + \sum_j \xi_j (a_\psi \log(b_\psi)) + \right. \\
& \left. - \sum_j \xi_j \log(\Gamma(a_\psi)) - \sum_j (a_\psi + 1) \xi_j \log(\psi_j) - b_\psi \sum_j (1 - \xi_j) \psi_j^{-1} \right]
\end{aligned}$$

which we express as

$$\log p(\boldsymbol{\theta}, \boldsymbol{\psi}, \boldsymbol{\xi}|\mathbf{y}, \cdot) \propto A + B \quad (1.35)$$

where each capital letter refers to the expression within the parenthesis of the expectations in equation (1.34).

$$\begin{aligned}
A \propto & -\frac{1}{2} (d_\xi - 1) \log(2\pi) - \frac{1}{2} \log(\det^*(\mathbf{T}_\xi D(\boldsymbol{\psi}_\xi) \mathbf{T}_\xi)) + \\
& -\frac{1}{2} \left( \boldsymbol{\theta}_\xi^T (\mathbf{T}_\xi D(\boldsymbol{\psi}_\xi) \mathbf{T}_\xi)^+ \boldsymbol{\theta}_\xi + \sigma^{-2} \left( \boldsymbol{\theta}_\xi^T \mathbf{Z}_\xi^T \mathbf{Z}_\xi \boldsymbol{\theta}_\xi - 2 \boldsymbol{\theta}_\xi^T \mathbf{Z}_\xi^T (\mathbf{y} - \alpha \mathbf{1}_n - \mathbf{X} \boldsymbol{\beta} - \mathbf{W} \boldsymbol{\zeta}) \right) \right), \quad (1.36)
\end{aligned}$$

define

$$\mathbf{u}_j = \mathbf{y} - \alpha \mathbf{1}_n - \sum_s X_s \gamma_s \beta_s - \sum_g \mathbf{W}_g \boldsymbol{\zeta}_g \quad (1.37)$$

and the vector  $\boldsymbol{\mu}_{\theta_\xi}$  and matrix  $\Sigma_{\theta_\xi}$

$$\boldsymbol{\mu}_{\theta_\xi} = \Sigma_{\theta_\xi}(\sigma^{-2})^{(1)} \mathbf{Z}_\xi^T(\mathbf{u}_j)^{(1)} \quad (1.38)$$

$$\Sigma_{\theta_\xi} = ((\mathbf{T}_\xi D(\boldsymbol{\psi}_\xi) \mathbf{T}_\xi)^+ + (\sigma^{-2})^{(1)} \mathbf{Z}_\xi^T \mathbf{Z}_\xi)^{-1} \quad (1.39)$$

Unlike in the  $\beta_s$  updates for the free variational parameters, these are still function of the vector  $\boldsymbol{\xi}$ . On completing the square we have

$$\boldsymbol{\theta}_\xi^T \Sigma_{\theta_\xi}^{-1} \boldsymbol{\theta}_\xi - 2\boldsymbol{\theta}_\xi^T (\Sigma_{\theta_\xi}^{-1}) \boldsymbol{\mu}_{\theta_\xi} = (\boldsymbol{\theta}_\xi - \boldsymbol{\mu}_{\theta_\xi})^T \Sigma_{\theta_\xi}^{-1} (\boldsymbol{\theta}_\xi - \boldsymbol{\mu}_{\theta_\xi}) - \boldsymbol{\mu}_{\theta_\xi}^T \Sigma_{\theta_\xi}^{-1} \boldsymbol{\mu}_{\theta_\xi}$$

$$\begin{aligned} \log q(\boldsymbol{\theta}, \boldsymbol{\psi}, \boldsymbol{\xi} | \mathbf{y}, \cdot) \propto & \left[ -\frac{1}{2}(d_\xi - 1) \log 2\pi - \frac{1}{2} \log(\det^*(\mathbf{T}_\xi D(\boldsymbol{\psi}_\xi) \mathbf{T}_\xi)) + \right. \\ & \left. - \frac{1}{2} \left( [\boldsymbol{\theta}_\xi - \boldsymbol{\mu}_{\theta_\xi}]^T \Sigma_{\theta_\xi}^{-1} [\boldsymbol{\theta}_\xi - \boldsymbol{\mu}_{\theta_\xi}] \right) - \boldsymbol{\mu}_{\theta_\xi}^T \Sigma_{\theta_\xi}^{-1} \boldsymbol{\mu}_{\theta_\xi} \right]_{[I(\sum_j \theta_{\xi_j}=0)]} + \\ & + \sum_j \xi_j (\log \kappa)^{(1)} + \sum_j (1 - \xi_j) (\log(1 - \kappa))^{(1)} + (a_\psi \log(b_\psi) + \\ & - \log(\Gamma(a_\psi)) \sum_j \xi_j - \sum_j (a_\psi + 1) \xi_j \log(\psi_j) - b_\psi \sum_j \xi_j \psi_j^{-1}) \end{aligned}$$

We can remove the index by adding the constraint on  $\mu_{\theta_\xi}$  and  $\Sigma_{\theta_\xi}$  with the matrix  $T_\xi$ .

$$\begin{aligned} \log q(\boldsymbol{\theta}, \boldsymbol{\psi}, \boldsymbol{\xi} | \mathbf{y}, \cdot) \propto & -\frac{1}{2} \log(\det^*(\mathbf{T}_\xi D(\boldsymbol{\psi}_\xi) \mathbf{T}_\xi)) + \sum_j \xi_j (\log \kappa)^{(1)} + \sum_j (1 - \xi_j) (\log \kappa)^{(1)} + \\ & - \frac{1}{2} (d_\xi - 1) \log(2\pi) - \frac{1}{2} \left( [\boldsymbol{\theta}_\xi - \mathbf{T}_\xi \boldsymbol{\mu}_{\theta_\xi}]^T (\mathbf{T}_\xi \Sigma_{\theta_\xi} \mathbf{T}_\xi)^+ [\boldsymbol{\theta}_\xi - \mathbf{T}_\xi \boldsymbol{\mu}_{\theta_\xi}] \right) + \\ & + \frac{1}{2} \boldsymbol{\mu}_{\theta_\xi}^T \mathbf{T}_\xi^T (\mathbf{T}_\xi^T \Sigma_{\theta_\xi} \mathbf{T}_\xi)^+ \mathbf{T}_\xi \boldsymbol{\mu}_{\theta_\xi} - \sum_j (a_\psi + 1) \xi_j \log(\psi_j) - b_\psi \sum_j \xi_j \psi_j^{-1} + \\ & + (a_\psi \log(b_\psi) - \log(\Gamma(a_\psi))) \sum_j \xi_j \end{aligned}$$

We can then identify the singular multivariate normal density

$$\begin{aligned}
\log q(\boldsymbol{\theta}, \boldsymbol{\psi}, \boldsymbol{\xi}|\mathbf{y}, \cdot) &\propto -\frac{1}{2}(d_\xi - 1) \log(2\pi) - \frac{1}{2} \log(\det^*(\mathbf{T}_\xi \Sigma_{\theta_\xi} T_\xi)) + \frac{1}{2} \log(\det^*(\mathbf{T}_\xi \Sigma_{\theta_\xi} \mathbf{T}_\xi)) + \\
&- \frac{1}{2} \left( [\boldsymbol{\theta}_\xi - \mathbf{T}_\xi \boldsymbol{\mu}_{\theta_\xi}]^T (\mathbf{T}_\xi \Sigma_{\theta_\xi} T_\xi)^+ [\boldsymbol{\theta}_\xi - \mathbf{T}_\xi \boldsymbol{\mu}_{\theta_\xi}] \right) + \frac{1}{2} \boldsymbol{\mu}_{\theta_\xi}^T \mathbf{T}_\xi^T (\mathbf{T}_\xi \Sigma_{\theta_\xi} \mathbf{T}_\xi)^+ \mathbf{T}_\xi \boldsymbol{\mu}_{\theta_\xi} + \\
&- \frac{1}{2} \log(\det^*(\mathbf{T}_\xi D(\boldsymbol{\psi}_\xi) \mathbf{T}_\xi)) + \sum_j \xi_j (\log \kappa)^{(1)} + \sum_j (1 - \xi_j) (\log(1 - \kappa))^{(1)} + \\
&- \sum_j (a_\psi + 1) \xi_j \log(\psi_j) - b_\psi \sum_j \xi_j \psi_j^{-1} + (a_\psi \log(b_\psi) - \log(\Gamma(a_\psi))) \sum_j \xi_j
\end{aligned}$$

which can be expressed as

$$\begin{aligned}
q(\boldsymbol{\theta}, \boldsymbol{\psi}, \boldsymbol{\xi}|\mathbf{y}, \cdot) &\propto \text{SMVN}_{d_\xi}(\mathbf{T}_\xi \boldsymbol{\mu}_{\theta_\xi}, \mathbf{T}_\xi \Sigma_{\theta_\xi} \mathbf{T}_\xi) \delta(\bar{\boldsymbol{\xi}}) \times & (1.40) \\
&\exp \left( \frac{1}{2} \boldsymbol{\mu}_{\theta_\xi}^T \mathbf{T}_\xi (\mathbf{T}_\xi \Sigma_{\theta_\xi} \mathbf{T}_\xi)^+ \mathbf{T}_\xi \boldsymbol{\mu}_{\theta_\xi} + \frac{1}{2} \log(\det^*(\mathbf{T}_\xi \Sigma_{\theta_\xi} \mathbf{T}_\xi)) + \sum_j \xi_j (\log \kappa)^{(1)} \right. \\
&- \frac{1}{2} \log(\det^*(\mathbf{T}_\xi D(\boldsymbol{\psi}_\xi) \mathbf{T}_\xi)) + \sum_j (1 - \xi_j) (\log(1 - \kappa))^{(1)} - \sum_j (a_\psi + 1) \xi_j \log(\psi_j) + \\
&\left. - b_\psi \sum_j \xi_j \psi_j^{-1} + (a_\psi \log(b_\psi) - \log(\Gamma(a_\psi))) \sum_j \xi_j \right) & (1.41)
\end{aligned}$$

We can identify the singular multivariate normal density (1.40) which is a function of  $\boldsymbol{\xi}$  and  $\boldsymbol{\psi}$ . The  $\boldsymbol{\xi}$  and  $\boldsymbol{\psi}$  component (1.41) contains terms which do not have a conjugate update. The first term

$$\boldsymbol{\mu}_{\theta_\xi}^T \mathbf{T}_\xi (\mathbf{T}_\xi \Sigma_{\theta_\xi} \mathbf{T}_\xi)^+ \mathbf{T}_\xi \boldsymbol{\mu}_{\theta_\xi} \quad (1.42)$$

has dependencies on  $\boldsymbol{\xi}$  in  $\boldsymbol{\mu}_{\theta_\xi}$  and  $\Sigma_{\theta_\xi}$  which are a function of  $\boldsymbol{\psi}$  and the remaining  $q$  expectations.

Thus

$$q(\boldsymbol{\theta}_\xi | \boldsymbol{\psi}, \boldsymbol{\xi}) = \text{SMVN}(\mathbf{T}_\xi \boldsymbol{\mu}_{\theta_\xi}, \mathbf{T}_\xi \Sigma_{\theta_\xi} \mathbf{T}_\xi) \quad \text{and} \quad q(\boldsymbol{\theta}_{\bar{\xi}} = 0 | \boldsymbol{\xi}) = 1, \quad (1.43)$$

or

$$q(\boldsymbol{\theta}|\boldsymbol{\xi}, \boldsymbol{\psi}) = \text{SMVN}(\mathbf{T}_\xi \boldsymbol{\mu}_{\theta_\xi}, \mathbf{T}_\xi \boldsymbol{\Sigma}_{\theta_\xi} \mathbf{T}_\xi) \delta(\boldsymbol{\theta}_\xi) \quad (1.44)$$

and

$$\begin{aligned} \log q(\boldsymbol{\theta}, \boldsymbol{\psi}, \boldsymbol{\xi}|\mathbf{y}, \cdot) &\propto \log(\text{SMVN}(\mathbf{T}_\xi \boldsymbol{\mu}_{\theta_\xi}, \mathbf{T}_\xi \boldsymbol{\Sigma}_{\theta_\xi} \mathbf{T}_\xi)) + \frac{1}{2} \boldsymbol{\mu}_{\theta_\xi}^T \mathbf{T}_\xi (\mathbf{T}_\xi^T \boldsymbol{\Sigma}_{\theta_\xi} \mathbf{T}_\xi)^{-1} \mathbf{T}_\xi \boldsymbol{\mu}_{\theta_\xi} + \quad (1.45) \\ &+ \frac{1}{2} \log(\det^*(\mathbf{T}_\xi \boldsymbol{\Sigma}_{\theta_\xi} \mathbf{T}_\xi)) - \frac{1}{2} \log(\det^*(\mathbf{T}_\xi D(\boldsymbol{\psi}_\xi) \mathbf{T}_\xi)) + \sum_j \xi_j (\log \kappa)^{(1)} + \\ &+ \sum_j (1 - \xi_j) (\log(1 - \kappa))^{(1)} - \sum_j (a_\psi + 1) \xi_j \log(\psi_j) - b_\psi \sum_j \xi_j \psi_j^{-1} + \\ &+ (a_\psi \log(b_\psi) - \log(\Gamma(a_\psi))) \sum_j \xi_j \end{aligned}$$


---

For  $w$  we have

$$\log q(w) = \mathbb{E}_{-w} \left[ \sum_s \log p(\beta_s | w, \gamma_s) + \log p(w | a_w, b_w) \right] + cst$$

$$\begin{aligned} q(w) &= \mathbb{E}_{-w} \left[ \sum_s -\frac{\gamma_s}{2} \left( \log w - w^{-1} \frac{\beta_s^2}{2} \right) (-a_w - 1) \log w - b_w w^{-1} \right] + cst \\ &\propto \log w \left( -\frac{1}{2} \left\{ \sum_s (\gamma_s)^{(1)} \right\} - a_w - 1 \right) - w^{-1} \left( \frac{1}{2} \left\{ \sum_s (\beta_s)^{(2)} \right\} + (b_w)^{(1)} \right) \quad (1.46) \end{aligned}$$

thus

$$q(w) = \text{Inv} - \text{Gamma}(a_w^*, b_w^*) \quad (1.47)$$

with parameters

$$a_w^* = \frac{1}{2} \left\{ \sum_s (\gamma_s)^{(1)} \right\} + a_w \quad (1.48)$$

$$b_w^* = \frac{1}{2} \left\{ \sum_s (\beta_s)^{(2)} \right\} + (b_w)^{(1)} \quad (1.49)$$


---

For  $v$  we have

$$\log q(v) = \mathbb{E}_{-v} \left[ \sum_g \log p(\zeta_g | v, \chi_g) + \log p(v | a_v, b_v) \right] + cst$$

$$\begin{aligned} q(v) &= \mathbb{E}_{-v} \left[ \sum_g \chi_g \left( -\frac{m_g}{2} \log v - v^{-1} \frac{\zeta_g^T \zeta_g}{2} \right) + (-a_v - 1) \log v - b_v v^{-1} \right] + cst \\ &\propto \log v \left( -\frac{1}{2} \left\{ \sum_g m_g (\chi_g)^{(1)} \right\} - a_v - 1 \right) - v^{-1} \left( \frac{1}{2} \left\{ \sum_g (\chi_g \zeta_g^T \zeta_g)^{(1)} \right\} + (b_v)^{(1)} \right) \end{aligned}$$

thus

$$q(v) = Inv - Gamma(a_v^*, b_v^*) \quad (1.50)$$

with parameters

$$a_v^* = \frac{1}{2} \left\{ \sum_g m_g (\chi_g)^{(1)} \right\} + a_v \quad (1.51)$$

$$b_v^* = \frac{1}{2} \left\{ \sum_g (\zeta_g^T \zeta_g)^{(1)} \right\} + (b_v)^{(1)} \quad (1.52)$$


---

$$\log q(\omega) \propto \mathbb{E}_{-\omega} \left[ \log \prod_s p(\gamma_s | \omega) + \log p(\omega) \right] \quad (1.53)$$

$$\begin{aligned} \log q(\omega) &\propto \sum_s (\gamma_s)^{(1)} \log \omega + \sum_s (1 - \gamma_s)^{(1)} \log(1 - \omega) + (a_\omega - 1) \log \omega + (b_\omega - 1) \log(1 - \omega) \\ &\propto \left( a_\omega + \sum_s (\gamma_s)^{(1)} - 1 \right) \log \omega + \left( b_{\omega,s} + p - \sum_s (\gamma_s)^{(1)} - 1 \right) \log(1 - \omega). \end{aligned}$$

which implies that

$$q(\omega) = \text{Beta}(a_\omega^*, b_\omega^*) \quad (1.54)$$

with parameters

$$a_\omega^* = a_\omega + \sum_s (\gamma_s)^{(1)} \quad (1.55)$$

$$b_\omega^* = b_\omega + p - \sum_s (\gamma_s)^{(1)} \quad (1.56)$$

where

$$(\omega)^{(1)} = a_\omega^* / (a_\omega^* + b_\omega^*) = a_\omega^* / (a_\omega + b_\omega + p) \quad (1.57)$$

$$(\log \omega)^{(1)} = \Psi(a_\omega^*) - \Psi(a_\omega^* + b_\omega^*)$$

$$(\log(1 - \omega))^{(1)} = \Psi(b_\omega^*) - \Psi(a_\omega^* + b_\omega^*)$$

where  $\Psi(\cdot)$  is the digamma function.

---


$$\log q(w_\alpha) = \mathbb{E}_{-w_\alpha} [\log p(\alpha | w_\alpha)] + \log p(w_\alpha | a_\alpha, b_\alpha) + cst \quad (1.58)$$

$$\begin{aligned} \log q(w_\alpha) &= \frac{1}{2} \log(w_\alpha^{-1}) - \frac{w_\alpha^{-1}}{2} \alpha^2 + (a_\alpha + 1) \log(w_\alpha^{-1}) - w_\alpha^{-1} (b_\alpha)^{(1)} + cst \\ &= \left( a_\alpha + \frac{1}{2} \right) \log(w_\alpha^{-1}) - w_\alpha^{-1} \left( (b_\alpha)^{(1)} + \frac{1}{2} (\alpha)^{(2)} \right) + cst \end{aligned}$$



Thus we have

$$q(w_\alpha) = \text{Inv} - \text{Gamma}(a_\alpha^*, b_\alpha^*) \quad (1.59)$$

with parameters

$$a_\alpha^* = a_\alpha + \frac{1}{2} \quad (1.60)$$

$$b_\alpha^* = (b_\alpha)^{(1)} + \frac{1}{2}(\alpha)^{(2)} \quad (1.61)$$

where

$$(w_\alpha^{-1})^{(1)} = a_\alpha^*/b_\alpha^* \quad (1.62)$$

$$(\log w_\alpha^{-1})^{(1)} = \Psi(a_\alpha^*) - \log b_\alpha^*. \quad (1.63)$$

$$\log q(b_w) = \mathbb{E}_{-b_w} \left[ \log p(w|a_w, b_w) + \log p(b_w|a_b, b_b) \right] \quad (1.64)$$

$$\begin{aligned} \log q(b_w) &= \mathbb{E}_{-b_w} \left[ a_w \log b_w - b_w w^{-1} + (a_b - 1) \log b_w - b_b b_w \right] + cst \\ &= a_w \log b_w - b_w (w)^{(-1)} + (a_b - 1) \log b_w - b_b b_w + cst \\ &= \log b_w (a_w + a_b - 1) - b_w ((w)^{(-1)} + b_b) + cst \end{aligned} \quad (1.65)$$

thus

$$q(b_w) = \text{Gamma}(\text{shape} = a_b^*, \text{rate} = b_b^*)$$

with parameters

$$a_b^* = a_w + a_b \quad (1.66)$$

$$b_b^* = (w)^{(-1)} + b_b \quad (1.67)$$

where

$$(b_w)^{(1)} = a_b^*/b_b^* \quad (1.68)$$

$$(\log b_w)^{(1)} = \Psi(a_b^*) - \log b_b^* \quad (1.69)$$

$$\log q(b_\alpha) = \mathbb{E}_{-b_\alpha} \left[ \log p(w_\alpha | a_\alpha, b_\alpha) + \log p(b_\alpha | a_{b,\alpha}, b_{b,\alpha}) \right] \quad (1.70)$$

$$\begin{aligned} \log q(b_\alpha) &= \mathbb{E}_{-b_\alpha} \left[ a_\alpha \log b_\alpha - b_\alpha w_\alpha^{-1} + (a_{b,\alpha} - 1) \log b_\alpha - b_{b,\alpha} b_\alpha \right] + cst \\ &= \log b_\alpha (a_\alpha + a_{\alpha,b} - 1) - b_\alpha ((w_\alpha)^{(-1)} + b_{\alpha,b}) + cst \end{aligned} \quad (1.71)$$

thus

$$q(b_\alpha) = \text{Gamma}(\text{shape} = a_{b,\alpha}^*, \text{rate} = b_{b,\alpha}^*)$$

with parameters

$$a_{b,\alpha}^* = a_\alpha + a_{b,\alpha} \quad (1.72)$$

$$b_{b,\alpha}^* = (w_\alpha)^{(-1)} + b_{b,\alpha} \quad (1.73)$$

where

$$(b_\alpha)^{(1)} = a_{b,\alpha}^*/b_{b,\alpha}^* \quad (1.74)$$

$$(\log b_\alpha)^{(1)} = \Psi(a_{b,\alpha}^*) - \log b_{b,\alpha}^* \quad (1.75)$$

$$\log q(b_v) = \mathbb{E}_{-b_v} \left[ \log p(v|a_v, b_v) + \log p(b_v|a_{bv}, b_{bv}) \right] \quad (1.76)$$

$$\begin{aligned} \log q(b_v) &= \mathbb{E}_{-b_v} \left[ a_v \log b_v - b_v v^{-1} + (a_{bv} - 1) \log b_v - b_{bv} b_v \right] + cst \\ &= a_v \log b_v - b_v (v^{-1})^{(1)} + (a_{bv} - 1) \log b_v - b_{bv} b_v + cst \\ &= \log b_v (a_v + a_{bv} - 1) - b_v (v^{-1})^{(1)} + b_{bv} + cst \end{aligned} \quad (1.77)$$

thus

$$q(b_v) = \text{Gamma}(\text{shape} = a_v^*, \text{rate} = b_v^*)$$

with parameters

$$a_{bv}^* = a_v + a_{bv} \quad (1.78)$$

$$b_{bv}^* = (v^{-1})^{(1)} + b_{bv} \quad (1.79)$$

where

$$(b_v)^{(1)} = a_{bv}^*/b_{bv}^* \quad (1.80)$$

$$(\log b_v)^{(1)} = \Psi(a_{bv}^*) - \log b_{bv}^* \quad (1.81)$$

$$\log q(\sigma^2) = \mathbb{E}_{-\sigma^2}[\log p(\sigma^2|\tau, \nu)] + \mathbb{E}_{-\sigma^2}[\log p(\mathbf{y}|\boldsymbol{\beta}, \boldsymbol{\theta}, \boldsymbol{\zeta}, \sigma^2)] + cst$$

Using  $\mathbb{E}_q[\mathbf{Z}_\xi \boldsymbol{\theta}_\xi] = \mathbf{Z}(\boldsymbol{\theta})^{(1)}$  and

$$\begin{aligned} \mathbb{E}_q[\boldsymbol{\zeta}_g^T \mathbf{W}_g^T \mathbf{W}_g \boldsymbol{\zeta}_g \chi_g | \chi_g] &= \mathbb{E}_q[\boldsymbol{\zeta}_g^T \mathbf{W}_g^T \mathbf{W}_g \boldsymbol{\zeta}_g | \chi_g] \chi_g \\ &= (\text{tr}(\mathbf{W}_g \boldsymbol{\Sigma}_{\zeta_g} \mathbf{W}_g^T) + \mathbb{E}_q[\boldsymbol{\zeta}_g^T | \chi_g] \mathbf{W}_g^T \mathbf{W}_g \mathbb{E}_q[\boldsymbol{\zeta}_g | \chi_g]) \chi_g \end{aligned}$$

so  $\mathbb{E}_g[\boldsymbol{\zeta}_g^T \mathbf{W}_g^T \mathbf{W}_g \boldsymbol{\zeta}_g \chi_g]$  referred to as  $(\boldsymbol{\zeta}_g^T \mathbf{W}_g^T \mathbf{W}_g \boldsymbol{\zeta}_g)^{(1)}$  and

$$\begin{aligned} \mathbb{E}_q[\mathbb{E}_q[\boldsymbol{\zeta}_g^T \mathbf{W}_g^T \mathbf{W}_g \boldsymbol{\zeta}_g \chi_g | \chi_g]] &= \left( \text{tr}(\mathbf{W}_g \boldsymbol{\Sigma}_{\zeta_g} \mathbf{W}_g^T) + \boldsymbol{\mu}_{\zeta_g}^T \mathbf{W}_g^T \mathbf{W}_g \boldsymbol{\mu}_{\zeta_g} \right) (\chi_g)^{(1)} \\ &= (\boldsymbol{\zeta}_g^T \mathbf{W}_g^T \mathbf{W}_g \boldsymbol{\zeta}_g)^{(1)} \end{aligned}$$

$$\begin{aligned}
\|\mathbf{u}\|^{(2)} &= \|\mathbf{y}\|^2 + n(\alpha)^{(2)} + \sum_s \|X_s\|^2(\beta_s)^{(2)} + \sum_g (\boldsymbol{\zeta}_g^T \mathbf{W}_g^T \mathbf{W}_g \boldsymbol{\zeta}_g)^{(1)} + \mathbb{E}_q[\boldsymbol{\theta}_\xi^T \mathbf{Z}_\xi^T \mathbf{Z}_\xi \boldsymbol{\theta}_\xi] \\
&\quad - 2 \sum_s \mathbf{y}^T X_s(\beta_s)^{(1)} - 2\mathbf{y}^T \mathbf{Z}(\boldsymbol{\theta}_\xi)^{(1)} - 2 \sum_g \mathbf{y}^T \mathbf{W}_g(\boldsymbol{\zeta}_g)^{(1)} - 2(\alpha)^{(1)} \mathbf{1}_n^T \mathbf{y} + \\
&\quad + 2 \sum_{s \neq s', s < s'} X_s^T X_{s'}(\beta_s)^{(1)}(\beta_{s'})^{(1)} + 2(\mathbf{Z}(\boldsymbol{\theta})^{(1)})^T \left( \sum_s X_s(\beta_s)^{(1)} \right) + \\
&\quad + 2(\mathbf{Z}(\boldsymbol{\theta})^{(1)})^T \left( \sum_g \mathbf{W}_g(\boldsymbol{\zeta}_g)^{(1)} \right) + 2 \sum_{g \neq g', g < g'} (\boldsymbol{\zeta}_g)^{(1)T} \mathbf{W}_g^T \mathbf{W}_{g'}(\boldsymbol{\zeta}_{g'})^{(1)} + \\
&\quad + 2(\alpha)^{(1)} \mathbf{1}_n^T \sum_s X_s(\beta_s)^{(1)} + 2(\alpha)^{(1)} \mathbf{1}_n^T \mathbf{Z}(\boldsymbol{\theta})^{(1)} + 2(\alpha)^{(1)} \mathbf{1}_n^T \sum_g \mathbf{W}_g(\boldsymbol{\zeta}_g)^{(1)} \\
&\quad + 2 \sum_s \sum_g (\beta_s)^{(1)} X_s^T \mathbf{W}_g(\boldsymbol{\zeta}_g)^{(1)}. \tag{1.82}
\end{aligned}$$

$$\begin{aligned}
\log q(\sigma^2) &= \frac{n}{2} \log \sigma^{-2} - \frac{\sigma^{-2}}{2} \mathbb{E}_{-\sigma^2} \left[ \left\| \mathbf{y} - \alpha \mathbf{1}_n - \sum_s X_s \gamma_s \beta_s - \mathbf{Z}_\xi \boldsymbol{\theta}_\xi - \sum_g \mathbf{W}_g \boldsymbol{\zeta}_g \right\|^2 \right] + \\
&\quad (\tau + 1) \log \sigma^{-2} - (\nu)^{(1)} \sigma^{-2} + cst \\
&= \log \sigma^{-2} \left( \frac{n}{2} + \tau + 1 \right) + \sigma^{-2} \left( \frac{\|\mathbf{u}\|^{(2)}}{2} + (\nu)^{(1)} \right) + cst \\
q(\sigma^2) &= \text{Inv} - \text{Gamma}(\nu^*, \tau^*)
\end{aligned}$$

$$\nu^* = \frac{n}{2} + \tau \tag{1.83}$$

$$\tau^* = \frac{\|\mathbf{u}\|^{(2)}}{2} + (\nu)^{(1)} \tag{1.84}$$

where

$$(\sigma^{-2})^{(1)} = \frac{\nu^*}{\tau^*} \quad (1.85)$$

$$(\log \sigma^{-2})^{(1)} = \Psi(\nu^*) - \log \tau^* \quad (1.86)$$

The update for  $q(\kappa)$  is

$$\begin{aligned} \log q(\kappa) &= \mathbb{E}_{-\kappa} \left[ \log \prod_j p(\xi_j | \kappa) + \log p(\kappa) \right] + cst \\ &= \mathbb{E}_{-\kappa} \left[ \left( \sum_j \xi_j \log(\kappa) + \sum_j (1 - \xi_j) \log(1 - \kappa) \right) \mathbb{I} \left[ \sum_j \xi_j \neq 1 \right] + (a_j - 1) \log(\kappa) + \right. \\ &\quad \left. + (b_j - 1) \log(1 - \kappa) \right] + cst \end{aligned}$$

As the update for  $\xi$  from the construction of the MCMC and the SMVN is

$$\mathbb{E}_q[\xi] = \mathbb{E}_q \left[ \xi \mathbb{I} \left[ \sum_j \xi_j \neq 1 \right] \right] = (\xi)^{(1)} \quad (1.87)$$

the update can be solved in closed form, using the MCMC marginal expectations.

$$\log q(\kappa) = \left( \sum_j (\xi_j)^{(1)} + a_j - 1 \right) \log(\kappa) + \left( d - \sum_j (\xi_j)^{(1)} + b_j - 1 \right) \log(1 - \kappa) + cst$$

$$q(\kappa) = \text{Beta}(a_\kappa^*, b_\kappa^*) \quad (1.88)$$

with parameters

$$a_{\kappa}^* = a_{\kappa} + \sum_j (\xi_j)^{(1)} \quad (1.89)$$

$$b_{\kappa}^* = b_{\kappa} + d - \sum_j (\xi_j)^{(1)} \quad (1.90)$$

where

$$(\kappa)^{(1)} = a_{\kappa}^* / (a_{\kappa}^* + b_{\kappa}^*) = a_{\kappa}^* / (a_{\kappa} + b_{\kappa} + d) \quad (1.91)$$

$$(\log \kappa)^{(1)} = \Psi(a_{\kappa}^*) - \Psi(a_{\kappa}^* + b_{\kappa}^*)$$

$$(\log(1 - \kappa))^{(1)} = \Psi(b_{\kappa}^*) - \Psi(a_{\kappa}^* + b_{\kappa}^*)$$

where  $\Psi(\cdot)$  is the digamma function.

---

The update for  $q(\varrho)$  is

$$\log q(\varrho) = \mathbb{E}_{-\varrho} [\log p(\chi_g | \varrho) + \log p(\varrho)] + cst$$

$$\propto \mathbb{E}_{-\varrho} [\chi_g \log(\varrho) + (1 - \chi_g) \log(1 - \varrho) + (a_{\varrho} - 1) \log(\varrho) + (b_{\varrho} - 1) \log(1 - \varrho)]$$

$$\propto ((\chi_g)^{(1)} + a_{\varrho} - 1) \log(\varrho) + (1 - (\chi_g)^{(1)} + b_{\varrho} - 1) \log(1 - \varrho)$$

$$q(\varrho) = \text{Beta}(a_{\varrho}^*, b_{\varrho}^*) \quad (1.92)$$

with parameters

$$a_{\varrho}^* = a_{\varrho} + \sum_g (\chi_g)^{(1)} \quad (1.93)$$

$$b_{\varrho}^* = b_{\varrho} + G - \sum_g (\chi_g)^{(1)} \quad (1.94)$$

where

$$(\varrho)^{(1)} = a_{\varrho}^* / (a_{\varrho}^* + b_{\varrho}^*) = a_{\varrho}^* / (a_{\varrho} + b_{\varrho} + G) \quad (1.95)$$

$$(\log \varrho)^{(1)} = \Psi(a_{\varrho}^*) - \Psi(a_{\varrho}^* + b_{\varrho}^*)$$

$$(\log(1 - \varrho))^{(1)} = \Psi(b_{\varrho}^*) - \Psi(a_{\varrho}^* + b_{\varrho}^*)$$

where  $\Psi(\cdot)$  is the digamma function.

---


$$\begin{aligned} \log q(\nu) &= \mathbb{E}_{-\nu} [\log p(\sigma^2 | \tau, \nu) + \log p(\nu)] + cst \\ &= \tau \log \nu - \nu (\sigma^{-2})^{(1)} + (a_{\nu} - 1) \log \nu - \nu b_{\nu} \\ &= (\tau + a_{\nu} - 1) \log \nu - ((\sigma^{-2})^{(1)} + b_{\nu}) \nu \end{aligned}$$

$$q(\nu) = \text{Inv} - \text{Gamma}(a_{\nu}^*, b_{\nu}^*)$$

$$a_{\nu}^* = \tau + a_{\nu} \quad (1.96)$$

$$b_{\nu}^* = (\sigma^{-2})^{(1)} + b_{\nu} \quad (1.97)$$



where

$$(\nu)^{(1)} = \frac{a_\nu^*}{b_\nu^*} \quad (1.98)$$

$$(\log \nu)^{(1)} = \Psi(a_\nu^*) - \log b_\nu^* \quad (1.99)$$

### 1.3 Pseudo Updates

The pseudo updates are derived in full. The prior parametrisation is

$$p(\Omega_j | \Delta_j, \Upsilon_j) = \left[ \frac{1}{(2\pi\Delta_j)^{(-1/2)}} \exp\left(-\frac{1}{2\Delta_j}\Omega_j^2\right) \right]^{\Upsilon_j} \delta_0(\Omega_j)^{1-\Upsilon_j} \quad (1.100)$$

$$p(\Delta_j | \Upsilon_j) = \left[ \frac{b_\Delta^{a_\Delta}}{\Gamma(a_\Delta)} (\Delta_j)^{-a_\Delta-1} \exp\{-b_\Delta\Delta_j^{-1}\} \right]^{\Upsilon_j} \delta_0(\Delta_j)^{1-\Upsilon_j} \quad (1.101)$$

$$P(\Upsilon_j) = (\kappa)^{\Upsilon_j} (1 - \kappa)^{1-\Upsilon_j} \quad (1.102)$$

The joint update  $q(\Omega_j, \Upsilon_j)$  is

$$q(\Omega_j, \Upsilon_j) \propto \mathbb{E}_{(-\Omega_j, \Upsilon_j)} \left[ \log p(y|\cdot) + \log p(\Omega_j | \Delta_j, \Upsilon_j) + p(\Delta_j | \Upsilon_j) + p(\Upsilon_j) \right] \quad (1.103)$$

$$\begin{aligned} q(\Omega_j, \Upsilon_j) \propto & \left[ N(\Omega_j | \mu_{\Omega_j}, \sigma_{\Omega_j}^2) \right]^{\Upsilon_j} [\delta_0(\Omega_j)]^{1-\Upsilon_j} \\ & \left[ \exp\left(\frac{1}{2} \log \sigma_{\Omega_j}^2 + (\log \kappa)^{(1)} - \frac{1}{2} \mathbb{E}_q(\log \Delta_j | \Upsilon_j) + \frac{1}{2} \mu_{\Omega_j}^2 \sigma_{\Omega_j}^{-2} + a_\Delta \log(b_\Delta) + \right. \right. \\ & \left. \left. - \log(\Gamma(a_\Delta)) - (a_\Delta + 1) \mathbb{E}_q(\log \Delta_j | \Upsilon_j) - b_\Delta \mathbb{E}_q[\Delta_j^{-1} | \Upsilon_j] \right) \right]^{\Upsilon} \\ & \left[ (1 - \kappa)^{(1)} + \delta_0(\Delta_j) \right]^{1-\Upsilon_j} \end{aligned}$$

$$\begin{aligned}
\sigma_{\Omega,j}^2 &= [\|Z_j\|^2(\sigma^{-2})^{(1)} + \mathbb{E}_q[\Delta_j^{-1}|\Upsilon_j]]^{-1} \\
\mu_{\Omega,j} &= \sigma_{\Omega,j}^2 Z_j^T \left[ (\sigma^{-2})^{(1)} \left( y - (\alpha)^{(1)} \mathbf{1}_n - \sum_{k \neq j} Z_k(\Omega_k)^{(1)} - \sum_s X_s(\beta_s)^{(1)} - \sum_g W_g(\zeta_g)^{(1)} \right) \right] \\
\pi(\Omega_j | \Upsilon_j = 1, y) &= \mathcal{N}(\mu_{\Omega,j}, \sigma_{\Omega,j}^2), \quad q(\Omega_j | \Upsilon_j = 0, y) = \delta_0(\Omega_j) \tag{1.104}
\end{aligned}$$

which gives us the update

$$\begin{aligned}
\sigma_{\Omega,j}^2 &= [\|Z_j\|^2(\sigma^{-2})^{(1)} + \mathbb{E}_q[\Delta_j^{-1}|\Upsilon_j = 1]]^{-1} \\
\mu_{\Omega,j} &= \sigma_{\Omega,j}^2 Z_j^T \left[ (\sigma^{-2})^{(1)} \left( \mathbf{y} - (\alpha)^{(1)} \mathbf{1}_n - \sum_{k \neq j} Z_k(\Omega_k)^{(1)} - \sum_s X_s(\beta_s)^{(1)} - \sum \mathbf{w}_g(\zeta_g)^{(1)} \right) \right]
\end{aligned}$$

The terms in the  $q(\Upsilon_j)$ , using  $\Delta_j = 0$  when  $\Upsilon_j = 0$ , are proportional to

$$\begin{aligned}
p(\Upsilon_j = 1) &\propto \exp \left( \frac{1}{2} \log \sigma_{\Omega,j}^2 + (\log \kappa)^{(1)} - (a_\Delta + 3/2) \mathbb{E}_q(\log \Delta_j | \Upsilon_j = 1) + \frac{1}{2} \mu_{\Omega,j}^2 \sigma_{\Omega,j}^{-2} + \right. \\
&\quad \left. + a_\Delta \log(b_\Delta) - \log(\Gamma(a_\Delta)) - b_\Delta \mathbb{E}_q[\Delta_j^{-1} | \Upsilon_j = 1] \right) \\
p(\Upsilon_j = 0) &\propto (\log(1 - \kappa))^{(1)}
\end{aligned}$$

Which after normalisation is

$$\begin{aligned}
(\Upsilon_j)^{(1)} &= \left[ 1 + \exp \left\{ \frac{1}{2} \log(\sigma_{\Omega,j}^{-2}) + (\log(1 - \kappa))^{(1)} - (\log \kappa)^{(1)} + \frac{1}{2} \mathbb{E}_q(\log \Delta_j | \Upsilon_j = 1) + \right. \right. \\
&\quad \left. \left. - \frac{1}{2} \mu_{\Omega,j}^2 \sigma_{\Omega,j}^{-2} - a_\Delta \log(b_\Delta) + \log(\Gamma(a_\Delta)) + (a_\Delta + 1) \mathbb{E}_q(\log \Delta_j | \Upsilon_j = 1) + \right. \right. \\
&\quad \left. \left. + b_\Delta \mathbb{E}_q[\Delta_j^{-1} | \Upsilon_j = 1] \right\} \right]^{-1}
\end{aligned}$$

Note that now

$$(\Omega_j)^{(1)} = \mu_{\Omega,j}(\Upsilon_j)^{(1)} \quad (1.105)$$

$$(\Omega_j)^{(2)} = (\sigma_{\Omega,j}^2 + \mu_{\Omega,j}^2)(\Upsilon_j)^{(1)}. \quad (1.106)$$

The approximating  $q$  density for  $\Delta_j$ , which is proportional to  $\Delta_j$  but conditional on  $\Upsilon_j$  is

$$\begin{aligned} \log q(\Delta_j|\Upsilon_j) &\propto \mathbb{E}_{q(-\Delta_j, -\Upsilon_j)} \left[ \log p(\Omega_j|\Upsilon_j, \Delta_j) + \log p(\Delta_j|\Upsilon_j) \right] \\ &\propto \mathbb{E}_{q(-\Delta_j, -\Upsilon_j)} \left[ \frac{1}{2} \log \Delta_j^{-1} \Upsilon_j - \frac{1}{2} \Omega_j^2 \Upsilon_j \Delta_j^{-1} + \Upsilon_j (a_\Delta + 1) \log \Delta_j^{-1} + \right. \\ &\quad \left. - b_\Delta \Upsilon_j \Delta_j^{-1} + (1 - \Upsilon_j) \delta_0(\Delta_j) \right] \\ &\propto \mathbb{E}_{q(-\Delta_j, -\Upsilon_j)} \left[ (\log \Delta_j^{-1}) \Upsilon_j \left( \frac{1}{2} + a_\Delta + 1 \right) - \Delta_j^{-1} \Upsilon_j \left( \frac{1}{2} \Omega_j^2 + b_\Delta \right) \right] \left[ (1 - \Upsilon_j) \delta_0(\Delta_j) \right] \end{aligned}$$

which gives us

$$q(\Delta_j|\Upsilon_j) \sim \left[ IG(\Delta_j|a_{\Delta_j}^*, b_{\Delta_j}^*) \right]^{\Upsilon_j} \left[ \delta_0(\Delta_j) \right]^{(1-\Upsilon_j)} \quad (1.107)$$

Under  $q$

$$q(\Delta_j|\Upsilon_j = 1, y) \sim IG(\Delta_j|a_{\Delta_j}^*, b_{\Delta_j}^*), \quad q(\Delta_j|\Upsilon_j = 0, y) \sim \delta_0(\Delta_j)$$

with updates

$$a_{\Delta,j}^* = \frac{1}{2} + a_\Delta \quad (1.108)$$

$$\begin{aligned} b_{\Delta,j}^* &= \frac{1}{2} \mathbb{E}[\Omega_j^2|\Upsilon_j = 1] + b_\Delta \\ &= \frac{1}{2} (\sigma_{\Omega,j}^2 + \mu_{\Omega,j}^2) + b_\Delta \end{aligned} \quad (1.109)$$

This gives

$$\begin{aligned}\mathbb{E}_q(\Delta_j^{-1}|\Upsilon_j = 1) &= a_{\Delta,j}^*/b_{\Delta,j}^* \\ \mathbb{E}_q(\log \Delta_j|\Upsilon_j = 1) &= \log(b_{\Delta,j}^*) - \Psi(a_{\Delta,j}^*)\end{aligned}\tag{1.110}$$

The auxiliary parameters create an alternative DAG which is updated via a “separate branch” of pseudo updates which helps us to approximate the model in order to guide the MCMC step. These updates are refined at each iteration by the full VI updates which account for the constraint. The “sparsity” parameter  $\kappa$  and the hyperparameters  $a_\Delta, b_\Delta$  which are set to  $a_\psi, b_\psi$  provide a link back to the constrained model.

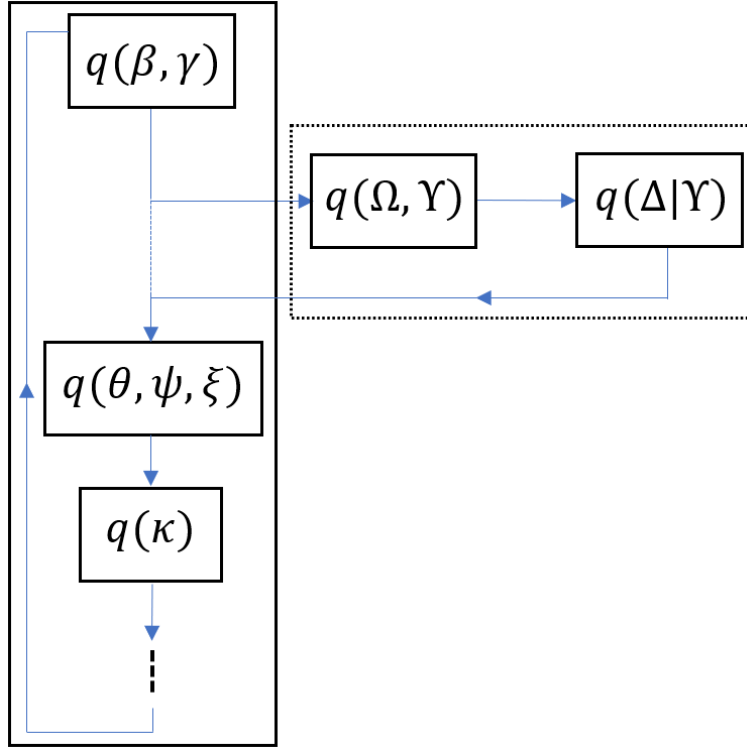

Figure S1: Diagram depicting the order and structure of the CAVI updates. Although the CAVI-MC permits any order, the pseudo updates for the auxiliary parameters help guide the MCMC and are performed directly before the  $q(\boldsymbol{\theta}, \boldsymbol{\psi}, \boldsymbol{\xi})$  MC update. The pseudo updates for an unconstrained model are in the dashed box and branch off prior to the joint  $q(\boldsymbol{\theta}, \boldsymbol{\psi}, \boldsymbol{\xi})$  update. The q approximating densities  $q(\Delta_j|\Upsilon_j = 1)$  are then used to guide the MCMC step.

## 1.4 ELBO

The objective of VI is to find the candidate from a family of densities  $\mathcal{D}$  which best approximates, the one closest in KL divergence, to exact conditional

$$q^*(\boldsymbol{\vartheta}) = \arg \min_{q^*(\boldsymbol{\vartheta}) \in \mathcal{D}} \text{KL}(q(\boldsymbol{\vartheta}) || p(\boldsymbol{\vartheta} | y))$$

This objective is not computable as it requires computing marginal likelihood. If we expand the expression

$$\text{KL}(q(\boldsymbol{\vartheta}) || p(\boldsymbol{\vartheta} | \mathbf{y})) = \mathbb{E}_{q(\boldsymbol{\vartheta})}[\log q(\boldsymbol{\vartheta})] - \mathbb{E}_{q(\boldsymbol{\vartheta})}[\log p(\boldsymbol{\vartheta}, \mathbf{y})] + \log p(\mathbf{y})$$

we can identify the elements which are a function of the parameters in the model. As the KL cannot be computed, an alternative objective that is equivalent to the KL up to an added constant is the evidence lower bound (ELBO).

$$\mathcal{L}(q) = \mathbb{E}_{q(\boldsymbol{\vartheta})}[\log p(\boldsymbol{\vartheta}, \mathbf{y})] - \log q(\boldsymbol{\vartheta}) \tag{1.111}$$

This function is the negative KL divergence plus the marginal likelihood, and is optimised at each iteration of the CAVI in order to monitor its convergence. The computational details are:

$$\begin{aligned} \mathcal{L}(q) &= \mathbb{E}_{q(\boldsymbol{\vartheta})}[\log p(\mathbf{y}, \boldsymbol{\vartheta})] - \mathbb{E}_{q(\boldsymbol{\vartheta})}[\log q(\boldsymbol{\vartheta})] \\ &= A(\mathbf{y} | \cdot) + B^*(\alpha | w_\alpha) + \sum_s B(\beta_s, \gamma_s | w, \omega) + \tilde{B}(\boldsymbol{\theta}, \boldsymbol{\psi}, \boldsymbol{\xi} | \kappa) + \sum_g \hat{B}(\boldsymbol{\zeta}_g, \chi_g | v, \varrho) + \\ &\quad + C(\omega) + \tilde{C}(\kappa) + \hat{C}(\varrho) + D(w) + D^*(w_\alpha) + \hat{D}(v) + \\ &\quad + F(\sigma^2 | \tau, \nu) + G(\nu) + H(b_w) + H^*(b_\alpha) + \hat{H}(b_v). \end{aligned}$$

The functions are

$$\begin{aligned}
A(\mathbf{y}|\boldsymbol{\beta}, \boldsymbol{\theta}, \boldsymbol{\zeta}, \sigma^2) &= \mathbb{E}_q[\log p(\mathbf{y}|\beta, \theta, \zeta, \sigma^2)] \\
&= \mathbb{E}_q \left[ -\frac{n}{2} \log(2\pi) + \frac{n}{2} \log(\sigma^{-2}) - \frac{1}{2\sigma^2} \|\mathbf{u}\|^2 \right] \\
&= -\frac{n}{2} \log(2\pi) + \frac{n}{2} \log(\sigma^2)^{(1)} - \frac{(\sigma^{-2})^{(1)} \|\mathbf{u}\|^{(2)}}{2}
\end{aligned}$$

where  $\|\mathbf{u}\|^2$  is defined in (1.82).

$$\begin{aligned}
B^*(\alpha|w_\alpha) &= \mathbb{E}_q[\log p(\alpha|w_\alpha)] - \mathbb{E}_q[\log q(\alpha)] \\
&= \left[ -\frac{1}{2} \log(2\pi) + \frac{1}{2} (\log w_\alpha^{-1})^{(1)} - \frac{1}{2(w_\alpha)^{(1)}} (\alpha)^{(2)} \right] - \\
&\quad \left[ -\frac{1}{2} \log(2\pi) - \frac{1}{2} (\log \sigma_\alpha^2) - \frac{1}{2(\sigma_\alpha^2)} \mathbb{E}_q [(\alpha - \mu_\alpha)^2] \right] \\
&= \frac{1}{2} \log(\sigma_\alpha^2) + \frac{1}{2} (\log w_\alpha^{-1})^{(1)} + \frac{1}{2} - \frac{1}{2} (w_\alpha^{-1})^{(1)} (\alpha)^{(2)} \tag{1.112}
\end{aligned}$$

$$\begin{aligned}
B(\beta_s, \gamma_s|w, \omega) &= \mathbb{E}_q[\log p(\beta_s|\gamma_s, w)] + \mathbb{E}_q[\log p(\gamma_s|\omega)] - \mathbb{E}_q[\log q(\beta_s, \gamma_s)] \\
&= (\gamma_s)^{(1)} \left[ -\frac{1}{2} \log(2\pi) + \frac{1}{2} (\log w^{-1})^{(1)} \right] - \mathbb{E}_q \left[ \frac{1}{2w} \gamma_s \beta_s^2 \right] + \\
&\quad + (1 - (\gamma_s)^{(1)}) \delta_0(\beta_s) + (\gamma_s)^{(1)} (\log \omega)^{(1)} + (1 - (\gamma_s)^{(1)}) (\log(1 - \omega))^{(1)} + \\
&\quad + \frac{1}{2} (\gamma_s)^{(1)} \left[ \log(2\pi) + \log \sigma_{\beta,s}^2 \right] + \mathbb{E}_q \left[ \frac{1}{2\sigma_{\beta,s}^2} \gamma_s (\beta_s^2 - 2\beta_s \mu_{\beta,s} + \mu_{\beta,s}^2) \right] + \\
&\quad - (1 - (\gamma_s)^{(1)}) \delta_0(\beta_s) - (\gamma_s)^{(1)} \log(\gamma_s)^{(1)} - (1 - (\gamma_s)^{(1)}) \log(1 - (\gamma_s)^{(1)}) \tag{1.113}
\end{aligned}$$

Simplifying using  $\mathbb{E}_q \left[ \frac{1}{2\sigma_{\beta,s}^2} \gamma_s \left( \beta_s^2 - 2\beta_s \mu_{\beta,s} + \mu_{\beta,s}^2 \right) \right] = -(\gamma_s)^{(1)}/2$

$$\begin{aligned}
B(\beta_s, \gamma_s | w, \omega) &= \frac{(\gamma_s)^{(1)}}{2} \left[ (\log w^{-1})^{(1)} + 2(\log \omega)^{(1)} + 1 + \log \sigma_{\beta,s}^2 + 1 - 2 \log(\gamma_s)^{(1)} \right] + \\
&\quad - \frac{(\gamma_s)^{(1)}}{2} \left[ (\sigma_{\beta,s}^2 + \mu_{\beta,s}^2)(w)^{(-1)} \right] + \\
&\quad + (1 - (\gamma_s)^{(1)}) \left[ (\log(1 - \omega))^{(1)} + \log(1 - (\gamma_s)^{(1)}) \right]
\end{aligned} \tag{1.114}$$

$$\begin{aligned}
\hat{B}(\boldsymbol{\zeta}_g, \chi_g | v, \varrho) &= \mathbb{E}_q[\log p(\boldsymbol{\zeta}_g | \chi_g, v)] + \mathbb{E}_q[\log p(\chi_g | \varrho)] - \mathbb{E}_q[\log q(\boldsymbol{\zeta}_g, \chi_g)] \\
&= (\chi_g)^{(1)} \left[ -\frac{m_g}{2} \log(2\pi) + \frac{m_g}{2} (\log v^{-1})^{(1)} \right] - \mathbb{E}_q \left[ \frac{1}{2v} \chi_g \boldsymbol{\zeta}_g^T \boldsymbol{\zeta}_g \right] + \\
&\quad + (1 - (\chi_g)^{(1)}) \delta_0(\boldsymbol{\zeta}_g) + (\chi_g)^{(1)} (\log \varrho)^{(1)} + (1 - (\chi_g)^{(1)}) (\log(1 - \varrho))^{(1)} + \\
&\quad + \frac{1}{2} (\chi_g)^{(1)} \left[ m_g \log(2\pi) + \log \det(\Sigma_{\zeta_g}) \right] - (1 - (\chi_g)^{(1)}) \delta_0(\boldsymbol{\zeta}_g) - (\chi_g)^{(1)} \log(\chi_g)^{(1)} \\
&\quad + \mathbb{E}_q \left[ \frac{1}{2} \chi_g (\boldsymbol{\zeta}_g - \boldsymbol{\mu}_{\zeta_g})^T \Sigma_{\zeta_g}^{-1} (\boldsymbol{\zeta}_g - \boldsymbol{\mu}_{\zeta_g}) \right] - (1 - (\chi_g)^{(1)}) \log(1 - (\chi_g)^{(1)})
\end{aligned} \tag{1.115}$$

Simplifying using  $\mathbb{E}_q \left[ \chi_g \left( \boldsymbol{\zeta}_g^T \Sigma_{\zeta_g}^{-1} \boldsymbol{\zeta}_g \right) \right] = m_g (\chi_g)^{(1)}$

$$\begin{aligned}
\hat{B}(\boldsymbol{\zeta}_g, \chi_g | v, \varrho) &= \frac{(\chi_g)^{(1)}}{2} \left( m_g (\log v^{-1})^{(1)} - \frac{1}{(v)^{(1)}} (\text{tr}(\Sigma_{\zeta_g}) + \boldsymbol{\mu}_{\zeta_g}^T \boldsymbol{\mu}_{\zeta_g}) + \log \det(\Sigma_{\zeta_g}) + m_g + \right. \\
&\quad \left. + 2(\log \varrho)^{(1)} - 2 \log((\chi_g)^{(1)}) \right) + \\
&\quad + (1 - (\chi_g)^{(1)}) \left( \log(1 - (\chi_g)^{(1)}) + (\log(1 - \varrho))^{(1)} \right)
\end{aligned} \tag{1.116}$$

$$\tilde{B}(\boldsymbol{\theta}, \boldsymbol{\xi}, \boldsymbol{\psi}|\cdot) = \mathbb{E}_{q(\boldsymbol{\vartheta})} \left[ \log p(\boldsymbol{\theta}|\boldsymbol{\psi}, \boldsymbol{\xi}) + \log p(\boldsymbol{\psi}|\boldsymbol{\xi}) + \log p(\boldsymbol{\xi}) \right] - \mathbb{E}_{\log q(\boldsymbol{\vartheta})} \left[ \log q(\boldsymbol{\theta}, \boldsymbol{\psi}, \boldsymbol{\xi}) \right] \quad (1.117)$$

The approximating density is only known up to a constant of proportionality but this is sufficient for the ELBO calculations.

$$\begin{aligned} \mathbb{E}_{q(\boldsymbol{\vartheta})} \left[ \log(p(\boldsymbol{\theta}, \boldsymbol{\xi}, \boldsymbol{\psi})) \right] &= -\frac{1}{2}((d_\xi)^{(1)} - 1) \log(2\pi) - \frac{1}{2}(\log(\det^*(\mathbf{T}_\xi D(\boldsymbol{\psi}_\xi) \mathbf{T}_\xi))^{(1)} + \\ &\quad - \frac{1}{2}(\boldsymbol{\theta}_\xi^T (\mathbf{T}_\xi D(\boldsymbol{\psi}_\xi) \mathbf{T}_\xi)^+ \boldsymbol{\theta}_\xi)^{(1)} + \sum_j (\xi_j)^{(1)} (\log \kappa)^{(1)} + \sum_j (1 - (\xi_j)^{(1)}) (\log \kappa)^{(1)} + \\ &\quad - \sum_j (a_\psi + 1) (\xi_j \log(\psi_j))^{(1)} - b_\psi \sum_j (\xi_j \psi_j^{-1})^{(1)} + (a_\psi \log(b_\psi) - \log(\Gamma(a_\psi))) \sum_j (\xi_j)^{(1)} \end{aligned}$$

The  $q$  expectations  $(\xi_j \log(\psi_j))^{(1)}$  and  $(\xi_j \psi_j^{-1})^{(1)}$  can be found using the law of iterative expectations but these will cancel. The free parameters are a function of  $\xi$  so when we take an expectation we have

$$\begin{aligned} \mathbb{E}_{q(\boldsymbol{\vartheta})} \left[ \log q(\boldsymbol{\theta}, \boldsymbol{\xi}, \boldsymbol{\psi}|\mathbf{y}) \right] &\propto \mathbb{E}_{q(\boldsymbol{\vartheta})} \left[ \log(\text{SMVN}(\boldsymbol{\theta})) \right] + \frac{1}{2}(\boldsymbol{\mu}_{\theta_\xi}^T \mathbf{T}_\xi (\mathbf{T}_\xi^T \Sigma_{\theta_\xi} \mathbf{T}_\xi)^+ \mathbf{T}_\xi \boldsymbol{\mu}_{\theta_\xi})^{(1)} + \\ &\quad + \frac{1}{2}(\log(\det^*(\mathbf{T}_\xi \Sigma_{\theta_\xi} \mathbf{T}_\xi))^{(1)} - \frac{1}{2}(\log(\det^*(\mathbf{T}_\xi D(\boldsymbol{\psi}_\xi) \mathbf{T}_\xi))^{(1)} + \\ &\quad + \sum_j \xi_j (\log \kappa)^{(1)} + \sum_j (1 - \xi_j) (\log(1 - \kappa))^{(1)} - \sum_j (a_\psi + 1) (\xi_j \log(\psi_j))^{(1)} + \\ &\quad + (a_\psi \log(b_\psi) - \log(\Gamma(a_\psi))) \sum_j (\xi_j)^{(1)} - b_\psi \sum_j (\xi_j \psi_j^{-1})^{(1)} \end{aligned} \quad (1.118)$$



$$\begin{aligned}
\mathbb{E}_{q(\boldsymbol{\vartheta})} \left[ \log(\text{SMVN}(\boldsymbol{\theta})) \right] &= -\frac{1}{2}((d_\xi)^{(1)} - 1) \log(2\pi) - \frac{1}{2}(\log(\det^*(\mathbf{T}_\xi \Sigma_\xi \mathbf{T}_\xi)))^{(1)} + \\
&\quad - \frac{1}{2} \left\{ (\boldsymbol{\theta}_\xi^T (\mathbf{T}_\xi \Sigma_\xi \mathbf{T}_\xi)^+ \boldsymbol{\theta}_\xi)^{(1)} - 2(\boldsymbol{\theta}_\xi^T (\mathbf{T}_\xi \Sigma_\xi \mathbf{T}_\xi)^+ \mathbf{T}_\xi \boldsymbol{\mu}_{\theta_\xi})^{(1)} + \right. \\
&\quad \left. + (\boldsymbol{\mu}_{\theta_\xi}^T \mathbf{T}_\xi (\mathbf{T}_\xi \Sigma_\xi \mathbf{T}_\xi)^+ \mathbf{T}_\xi \boldsymbol{\mu}_{\theta_\xi})^{(1)} \right\} \tag{1.119}
\end{aligned}$$

Bringing together the expression for  $\tilde{B}$

$$\begin{aligned}
\tilde{B}(\boldsymbol{\theta}, \boldsymbol{\psi}, \boldsymbol{\xi}|\cdot) &= \mathbb{E}_{q(\boldsymbol{\vartheta})} \left[ \log p(\boldsymbol{\theta}|\boldsymbol{\xi}, \boldsymbol{\psi}) + \log p(\boldsymbol{\psi}|\boldsymbol{\xi}, a_\psi, b_\psi) + \log p(\boldsymbol{\xi}|\kappa) \right] - \mathbb{E}_{q(\boldsymbol{\vartheta})} \left[ \log q(\boldsymbol{\theta}, \boldsymbol{\xi}) \right] \\
&= -\frac{1}{2}(\log(\det^*(\mathbf{T}_\xi D(\boldsymbol{\psi}_\xi) \mathbf{T}_\xi)))^{(1)} + \frac{1}{2}(\log(\det^*(\mathbf{T}_\xi \Sigma_\xi \mathbf{T}_\xi)))^{(1)} + \\
&\quad - \frac{1}{2} \left\{ (\boldsymbol{\theta}_\xi^T (\mathbf{T}_\xi D(\boldsymbol{\psi}_\xi) \mathbf{T}_\xi)^+ \boldsymbol{\theta}_\xi)^{(1)} - (\boldsymbol{\theta}_\xi^T (\mathbf{T}_\xi \Sigma_\xi \mathbf{T}_\xi)^+ \boldsymbol{\theta}_\xi)^{(1)} \right\} + \\
&\quad + (\boldsymbol{\theta}_\xi^T (\mathbf{T}_\xi \Sigma_\xi \mathbf{T}_\xi)^+ \mathbf{T}_\xi \boldsymbol{\mu}_{\theta_\xi})^{(1)} \tag{1.120}
\end{aligned}$$

$$\begin{aligned}
\tilde{C}(\kappa) &= \mathbb{E}_q[\log p(\kappa)] - \mathbb{E}_q[\log q(\kappa)] \\
&= \log B(a_\kappa^*, b_\kappa^*) - \log B(a_\kappa, b_\kappa) + (a_\kappa^* - a_\kappa)(\log \kappa)^{(1)} + (b_\kappa^* - b_\kappa)(\log[1 - \kappa])^{(1)} \tag{1.121}
\end{aligned}$$

$$\begin{aligned}
C(\omega) &= \mathbb{E}_q[\log p(\omega)] - \mathbb{E}_q[\log q(\omega)] \\
&= \log B(a_\omega^*, b_\omega^*) - \log B(a_\omega, b_\omega) + \\
&\quad + (a_\omega^* - a_\omega)(\log \omega)^{(1)} + (b_\omega^* - b_\omega)(\log(1 - \omega))^{(1)} \tag{1.122}
\end{aligned}$$

$$\begin{aligned}
\hat{C}(\varrho) &= \mathbb{E}_q[\log p(\varrho)] - \mathbb{E}_q[\log q(\varrho)] \\
&= \log B(a_\varrho^*, b_\varrho^*) - \log B(a_\varrho, b_\varrho) + (a_\varrho^* - a_\varrho)(\log \varrho)^{(1)} + (b_\varrho^* - b_\varrho)(\log[1 - \varrho])^{(1)}
\end{aligned} \tag{1.123}$$

$$\begin{aligned}
D(w) &= \mathbb{E}_q[\log p(w)] - \mathbb{E}_q[\log q(w)] \\
&= \mathbb{E}_q \left[ a_w \log b_w - \log \Gamma(a_w) + (a_w + 1) \log w^{-1} - b_w w^{-1} \right] + \\
&\quad - \mathbb{E}_q \left[ a_w^* \log b_w^* - \log \Gamma(a_w^*) - (a_w^* + 1) \log w^{-1} + b_w^* w^{-1} \right] \\
&= a_w (\log b_w)^{(1)} - a_w^* \log b_w^* - \log \Gamma(a_w) + \log \Gamma(a_w^*) + \\
&\quad + (a_w - a_w^*)(\log w^{-1})^{(1)} + (b_w^* - (b_w)^{(1)})(w^{-1})^{(1)}
\end{aligned} \tag{1.124}$$

$$\begin{aligned}
D^*(w_\alpha) &= \mathbb{E}_q[\log p(w_\alpha)] - \mathbb{E}_q[\log q(w_\alpha)] \\
&= \mathbb{E}_q \left[ a_\alpha \log b_\alpha - \log \Gamma(a_\alpha) + (a_\alpha + 1) \log w_\alpha^{-1} - b_\alpha w_\alpha^{-1} \right] + \\
&\quad - \mathbb{E}_q \left[ a_\alpha^* \log b_\alpha^* - \log \Gamma(a_\alpha^*) - (a_\alpha^* + 1) \log w_\alpha^{-1} + b_\alpha^* w_\alpha^{-1} \right] \\
&= a_\alpha (\log b_\alpha)^{(1)} - a_\alpha^* \log b_\alpha^* - \log \Gamma(a_\alpha) + \log \Gamma(a_\alpha^*) + \\
&\quad + (a_\alpha - a_\alpha^*)(\log w_\alpha^{-1})^{(1)} + (b_\alpha^* - (b_\alpha)^{(1)})(w_\alpha^{-1})^{(1)}
\end{aligned} \tag{1.125}$$

$$\begin{aligned}
\hat{D}(v) &= \mathbb{E}_q[\log p(v)] - \mathbb{E}_q[\log q(v)] \\
&= \mathbb{E}_q \left[ a_v \log b_v - \log \Gamma(a_v) + (a_v + 1) \log v^{-1} - b_v v^{-1} \right] + \\
&\quad - \mathbb{E}_q \left[ a_v^* \log b_v^* - \log \Gamma(a_v^*) - (a_v^* + 1) \log v^{-1} + b_v^* v^{-1} \right] \\
&= a_v (\log b_v)^{(1)} - a_v^* \log b_v^* - \log \Gamma(a_v) + \log \Gamma(a_v^*) + \\
&\quad + (a_v - a_v^*) (\log v^{-1})^{(1)} + (b_v^* - (b_v)^{(1)}) (v^{-1})^{(1)} \tag{1.126}
\end{aligned}$$

$$\begin{aligned}
F(\sigma^2 | \tau, \nu) &= \mathbb{E}_q[\log p(\sigma^2 | \tau, \nu)] - \mathbb{E}_q[\log q(\sigma^2)] \\
&= \left[ \tau (\log \nu)^{(1)} - \log \Gamma(\tau) + (\tau + 1) (\log \sigma^{-2})^{(1)} - (\nu)^{(1)} (\sigma^{-2})^{(1)} \right] + \\
&\quad - \left[ \tau^* (\log \nu^*) - \log \Gamma(\tau^*) + (\tau^* + 1) (\log \sigma^{-2})^{(1)} + \nu^* (\sigma^{-2})^{(1)} \right] \\
&= \log \Gamma(\tau^*) - \log \Gamma(\tau) + (\tau - \tau^*) (\log \sigma^{-2})^{(1)} + \tau (\log \nu)^{(1)} + \\
&\quad - \tau^* (\log \nu^*) + (\sigma^{-2})^{(1)} (\nu^* - (\nu)^{(1)}) \tag{1.127}
\end{aligned}$$

$$\begin{aligned}
G(\nu) &= \mathbb{E}_q[\log p(\nu)] - \mathbb{E}_q[\log q(\nu)] \\
&= a_\nu \log b_\nu - a_\nu^* \log b_\nu^* + \log \Gamma(a_\nu^*) - \log \Gamma(a_\nu) + \\
&\quad + (a_\nu - a_\nu^*) (\log \nu)^{(1)} + (b_\nu - b_\nu^*) (\nu)^{(1)}. \tag{1.128}
\end{aligned}$$

$$\begin{aligned}
H(b_w) &= \mathbb{E}_q[\log p(b_w)] - \mathbb{E}_q[\log q(b_w)] \\
&= \mathbb{E}_q \left[ a_b \log b_b - \log \Gamma(a_b) + (a_b - 1) \log b_w - b_b b_w \right] + \\
&\quad \mathbb{E}_q \left[ a_b^* \log b_b^* - \log \Gamma(a_b^*) + (a_b^* - 1) \log b_w - b_b^* b_w \right] \\
&= a_b \log b_b - a_b^* \log b_b^* - \log \Gamma(a_b) + \log \Gamma(a_b^*) + (\log b_w)^{(1)}(a_b - a_b^*) + \\
&\quad + (b_w)^{(1)}(b_b^* - b_b) \tag{1.129}
\end{aligned}$$

$$\begin{aligned}
H^*(b_\alpha) &= \mathbb{E}_q[\log p(b_\alpha)] - \mathbb{E}_q[\log q(b_\alpha)] \\
&= \mathbb{E}_q \left[ a_{b,\alpha} \log b_{b,\alpha} - \log \Gamma(a_{b,\alpha}) + (a_{b,\alpha} - 1) \log b_\alpha - b_\alpha b_{b,\alpha} \right] + \\
&\quad \mathbb{E}_q \left[ a_{b,\alpha}^* \log b_\alpha^* - \log \Gamma(a_{b,\alpha}^*) + (a_{b,\alpha}^* - 1) \log b_\alpha - b_\alpha^* b_{b,\alpha} \right] \\
&= a_{b,\alpha} \log b_{b,\alpha} - a_{b,\alpha}^* \log b_\alpha^* - \log \Gamma(a_{b,\alpha}) + \log \Gamma(a_{b,\alpha}^*) + (\log b_\alpha)^{(1)}(a_{b,\alpha} - a_{b,\alpha}^*) + \\
&\quad + (b_\alpha)^{(1)}(b_{b,\alpha}^* - b_{b,\alpha}) \tag{1.130}
\end{aligned}$$

$$\begin{aligned}
\hat{H}(b_v) &= \mathbb{E}_q[\log p(b_v)] - \mathbb{E}_q[\log q(b_v)] \\
&= \mathbb{E}_q \left[ a_{bv} \log b_{bv} - \log \Gamma(a_{bv}) + (a_{bv} - 1) \log b_v - b_{bv} b_v \right] + \\
&\quad \mathbb{E}_q \left[ a_{bv}^* \log b_{bv}^* - \log \Gamma(a_{bv}^*) + (a_{bv}^* - 1) \log b_v - b_{bv}^* b_v \right] \\
&= a_{bv} \log b_{bv} - a_{bv}^* \log b_{bv}^* - \log \Gamma(a_{bv}) + \log \Gamma(a_{bv}^*) + (\log b_v)^{(1)}(a_{bv} - a_{bv}^*) + \\
&\quad + (b_v)^{(1)}(b_{bv}^* - b_{bv}) \tag{1.131}
\end{aligned}$$

## 2 RJMCMC moves and model proposals

This section explains the RJMCMC moves in detail. In the RJMCMC the proposal for  $\psi_j | \xi_j = 1$  is from the  $q$  approximating density of the auxiliary parameter  $\Omega_j$ , where the free parameters are obtained from the pseudo updates. As  $q(\boldsymbol{\theta} | \boldsymbol{\psi}, \boldsymbol{\xi})$  is available in closed form, we are able to sample directly from it. Since the proposals do not depend on their current values, this leads to a reverse move which is a random function and thus a Jacobian which is equal to 1.

The RJMCMC involves the following steps:

- Select a birth-death or swap move with probability  $\phi, 1 - \phi$ .
- Propose a new model  $\boldsymbol{\xi}'$  with probability  $j(\boldsymbol{\xi}, \boldsymbol{\xi}')$ .
- Generate  $\mathbf{u}$  from our proposal density  $g(\mathbf{u} | \cdot) \sim q(\boldsymbol{\theta}' | \boldsymbol{\psi}', \boldsymbol{\xi}') \prod_j \pi(\boldsymbol{\psi}'_j | a_{\Delta_j}^*, b_{\Delta_j}^*, \boldsymbol{\xi}')$ .
- Set  $(\boldsymbol{\theta}'_{(\boldsymbol{\xi}', \boldsymbol{\psi}'), \boldsymbol{\psi}'_{\boldsymbol{\xi}'}, \mathbf{u}') = h(\boldsymbol{\theta}_{(\boldsymbol{\xi}, \boldsymbol{\psi}), \boldsymbol{\psi}_{\boldsymbol{\xi}}, \mathbf{u})}$  where  $h$  is a specified invertible mapping function.
- Accept the proposed move to model  $\boldsymbol{\xi}'$  with probability

$$\alpha_b = \min \left\{ 1, \frac{\left[ q(\boldsymbol{\theta}' | \mathbf{y}, \boldsymbol{\xi}', \boldsymbol{\psi}') q(\boldsymbol{\psi}', \boldsymbol{\xi}' | \mathbf{y}) \right] j_m(\boldsymbol{\xi}', \boldsymbol{\xi}) g'(\mathbf{u}' | \cdot)}{\left[ q(\boldsymbol{\theta} | \mathbf{y}, \boldsymbol{\xi}, \boldsymbol{\psi}) q(\boldsymbol{\psi}, \boldsymbol{\xi} | \mathbf{y}) \right] j_m(\boldsymbol{\xi}, \boldsymbol{\xi}') g(\mathbf{u} | \cdot)} \left| \frac{\partial h(\boldsymbol{\theta}_{(\boldsymbol{\xi}, \boldsymbol{\psi}), \boldsymbol{\psi}_{\boldsymbol{\xi}}, \mathbf{u})}}{\partial (\boldsymbol{\theta}_{(\boldsymbol{\xi}, \boldsymbol{\psi}), \boldsymbol{\psi}_{\boldsymbol{\xi}}, \mathbf{u})}} \right| \right\}.$$

where the target is in the square parenthesis.

The acceptance probability for the RJMCMC between-model move, as the Jacobian is equal to 1, simplifies to

$$\alpha_b = \min \left\{ 1, \frac{q(\boldsymbol{\xi}', \boldsymbol{\psi}' | \mathbf{y}) j_m(\boldsymbol{\xi}', \boldsymbol{\xi}) \pi(\boldsymbol{\psi} | \boldsymbol{\xi})}{q(\boldsymbol{\xi}, \boldsymbol{\psi} | \mathbf{y}) j_m(\boldsymbol{\xi}, \boldsymbol{\xi}') \pi(\boldsymbol{\psi}' | \boldsymbol{\xi}')} \right\} \quad (2.1)$$

where  $j_m(\boldsymbol{\xi}, \boldsymbol{\xi}')$  is the proposal probability for the latent variable selection parameter  $\boldsymbol{\xi}'$  (which depends on the move type and the data) and

$$\begin{aligned} \log q(\boldsymbol{\psi}, \boldsymbol{\xi}|\mathbf{y}, \cdot) &\propto \frac{1}{2} \boldsymbol{\mu}_{\theta(\boldsymbol{\xi}, \boldsymbol{\psi})}^T \mathbf{T}_{\boldsymbol{\xi}} (\mathbf{T}_{\boldsymbol{\xi}}^T \boldsymbol{\Sigma}_{\theta(\boldsymbol{\xi}, \boldsymbol{\psi})} \mathbf{T}_{\boldsymbol{\xi}})^{-1} \mathbf{T}_{\boldsymbol{\xi}} \boldsymbol{\mu}_{\theta(\boldsymbol{\xi}, \boldsymbol{\psi})} + \frac{1}{2} \log \left( \det^* (\mathbf{T}_{\boldsymbol{\xi}} \boldsymbol{\Sigma}_{\theta(\boldsymbol{\xi}, \boldsymbol{\psi})} \mathbf{T}_{\boldsymbol{\xi}}) \right) + \\ &- \frac{1}{2} \log (\det^* (\mathbf{T}_{\boldsymbol{\xi}} D(\boldsymbol{\psi}_{\boldsymbol{\xi}}) \mathbf{T}_{\boldsymbol{\xi}})) + \sum_j \xi_j (\log \kappa)^{(1)} + \sum_j (1 - \xi_j) (\log(1 - \kappa))^{(1)} + \\ &- (a_{\boldsymbol{\psi}} + 1) \sum_j \xi_j \log(\psi_j) - b_{\boldsymbol{\psi}} \sum_j \xi_j \psi_j^{-1} + (a_{\boldsymbol{\psi}} \log(b_{\boldsymbol{\psi}}) - \log(\Gamma(a_{\boldsymbol{\psi}}))) \sum_j \xi_j. \end{aligned} \quad (2.2)$$

As described in the main paper, a univariate approximation is used to calculate  $j(\boldsymbol{\xi}, \boldsymbol{\xi}')$  in the birth-death or swap move of the RJMCMC.

## 2.1 Birth-death and swap moves

To guide the RJMCMC over a large binary space, we use a univariate approximation  $\tilde{p}(\xi_j = 1|\boldsymbol{\vartheta})$  of the joint approximating density  $q(\boldsymbol{\psi}, \boldsymbol{\xi})$  relative to the  $j$ th element. The probability of a new model  $j_m(\boldsymbol{\xi}, \boldsymbol{\xi}')$  is a function of this approximation and the move type.

Each time a variable is selected for (or removed from) the model, the remaining approximate probabilities proposal for all elements outside of the model must be renormalised. The normalised probabilities for a variable  $h$  to be selected for the model, the birth move is

$$b_h(\boldsymbol{\vartheta}) = \frac{\tilde{p}_h(\xi_h = 1|\boldsymbol{\vartheta})}{\sum_{j \notin \mathcal{M}} \tilde{p}_j(\xi_j = 1|\boldsymbol{\vartheta})}, \quad (2.3)$$

where any  $\tilde{p}(\xi_j = 1|\boldsymbol{\vartheta})$  below a small threshold  $\varepsilon_b$  (set at  $1 \times 10^{-30}$ ) is replaced by  $\varepsilon_b$  to avoid zero probabilities. The normalised probabilities to remove a variable  $h$  from the

model  $\mathcal{M}$ , the death move is

$$d_h(\boldsymbol{\vartheta}) = \frac{1 - \tilde{p}_h(\xi_h = 1|\boldsymbol{\vartheta}) + \varepsilon_d}{\sum_{j \in \mathcal{M}} (1 - \tilde{p}_j(\xi_j = 1|\boldsymbol{\vartheta}) + \varepsilon_d)} \quad (2.4)$$

as we select the variables to remove with probability inversely proportional to the approximate probability of inclusion.  $\varepsilon_d$  guarantees that the probabilities are comparable when they are close to the limit of their domain. The difference between the groups is relative to the size of  $\varepsilon_d$ .

If  $i$  is the current iteration, define  $\sum_j (\xi_j)^{[i]} = (d_\xi)^{[i]}$  the size of the current model in the MCMC, the proposal is generated in the following way:

Sample (birth-death) and swap with probability  $\phi$  and  $1-\phi$  respectively if  $2 \leq (d_\xi)^{[i]} < d$ :

- (Birth-Death) Sample uniformly birth or death:

– (Birth): If  $(d_\xi)^{[i]} = 0$  add 2 variables else add 1.

$$(d_\xi)^{[i]} \neq 0 \text{ (Birth)} : \frac{j_m(\boldsymbol{\xi}', \boldsymbol{\xi})}{j_m(\boldsymbol{\xi}, \boldsymbol{\xi}')} = \frac{\phi(0.5)d(\boldsymbol{\vartheta})}{\phi(0.5)b(\boldsymbol{\vartheta})} \quad (2.5)$$

$$(d_\xi)^{[i]} = 0 \text{ (Birth)} : \frac{j_m(\boldsymbol{\xi}', \boldsymbol{\xi})}{j_m(\boldsymbol{\xi}, \boldsymbol{\xi}')} = \frac{\phi(0.5)}{\phi(0.5)(b_{(h)}(\boldsymbol{\vartheta})b_{(l)}(\boldsymbol{\vartheta}) + b_{(l)}(\boldsymbol{\vartheta})b_{(h)}(\boldsymbol{\vartheta}))} \quad (2.6)$$

– (Death): If  $d_\xi = 2$  remove 2 variables else remove 1.

$$(d_\xi)^{[i]} = 2 \text{ (Death)} : \frac{j_m(\boldsymbol{\xi}', \boldsymbol{\xi})}{j_m(\boldsymbol{\xi}, \boldsymbol{\xi}')} = \frac{\phi(0.5)(b_{(h)}(\boldsymbol{\vartheta})b_{(l)}(\boldsymbol{\vartheta}) + b_{(l)}(\boldsymbol{\vartheta})b_{(h)}(\boldsymbol{\vartheta}))}{\phi(0.5)} \quad (2.7)$$

$$(d_\xi)^{[i]} \notin \{0, 2\} \text{ (Death)} : \frac{j_m(\boldsymbol{\xi}', \boldsymbol{\xi})}{j_m(\boldsymbol{\xi}, \boldsymbol{\xi}')} = \frac{\phi(0.5)b(\boldsymbol{\vartheta})}{\phi(0.5)d(\boldsymbol{\vartheta})} \quad (2.8)$$

When we add two elements  $h$  and  $l$  the order is not important. As the probability of

selecting each element is not the same, we have to add the probabilities so that

$$b_{(h)}(\boldsymbol{\vartheta})b_{(l)}(\boldsymbol{\vartheta}) + b_{(l)}(\boldsymbol{\vartheta})b_{(h)}(\boldsymbol{\vartheta}) \quad (2.9)$$

is the probability of choosing element  $h$  first and element  $l$  second plus the probability of choosing element  $l$  first and element  $h$  second (the order is in the bracket).

- (Swap):
  - Sample a variable included in the model  $h$  and swap with one outside  $l$ .

$$\text{(Swap)} : \frac{j_m(\boldsymbol{\xi}', \boldsymbol{\xi})}{j_m(\boldsymbol{\xi}, \boldsymbol{\xi}')} = \frac{(1 - \phi)d_l(\boldsymbol{\vartheta})b_h(\boldsymbol{\vartheta})}{(1 - \phi)d_h(\boldsymbol{\vartheta})b_l(\boldsymbol{\vartheta})}. \quad (2.10)$$

## 2.2 Within-model moves

Within-model samples are included so that both  $\boldsymbol{\psi}$  and  $\boldsymbol{\theta}$  are sampled sufficiently. This enables the calculation of  $q$  expectations within the ELBO and the free parameter updates for  $q(\sigma^2)$ . Its is particularly important when estimating  $\|u\|^{(2)}$  as the calculation has to be split into its component parts, because the latent variables which perform variable selection need to be incorporated for the expectations. If  $\boldsymbol{\theta}|\boldsymbol{\xi}, \boldsymbol{\psi}$  has not been sampled sufficiently to estimate  $\mathbb{E}_q[\boldsymbol{\theta}_\xi^T \mathbf{Z}_\xi^T \mathbf{Z}_\xi \boldsymbol{\theta}_\xi]$ , then the cross product terms may not be sufficiently large enough to prevent the dot product from having a negative value.

The within-model move is performed after a successful between-model move and for a random subset of the total number of iterations. Conditional on  $\boldsymbol{\xi}$ , propose  $\psi_j$  for each  $j$  element in the model

$$\pi(\psi_j|\xi_j = 1) = IG(\psi_j|a_{\Delta_j}^*, b_{\Delta_j}^*) \quad (2.11)$$



and then propose the vector  $\theta$  directly from the target distribution

$$\pi(\boldsymbol{\theta}_\xi | \boldsymbol{\xi}, \boldsymbol{\psi}) = SMVN_{d_\xi}(\boldsymbol{\theta}_\xi | \boldsymbol{\mu}_{\boldsymbol{\theta}_{(\xi, \boldsymbol{\psi})}}, \boldsymbol{\Sigma}_{\boldsymbol{\theta}_{(\xi, \boldsymbol{\psi})}}). \quad (2.12)$$

The acceptance probability simplifies to

$$\alpha_w = \min \left\{ 1, \frac{q(\boldsymbol{\psi}' | \mathbf{y}, \boldsymbol{\xi}) \pi(\boldsymbol{\psi} | \boldsymbol{\xi})}{q(\boldsymbol{\psi} | \mathbf{y}, \boldsymbol{\xi}) \pi(\boldsymbol{\psi}' | \boldsymbol{\xi})} \right\} \quad (2.13)$$

where  $\log q(\boldsymbol{\psi} | \boldsymbol{\xi}, \mathbf{y})$  is proportional to (2.2).

### 3 Proofs

Here are some simple proofs of the results used in the derivations.

#### 3.1 Proof: Simplification of the constraint matrix

We can simplify the calculations.  $\mathbf{T}\mathbf{T}^T = \mathbf{T}\mathbf{T} = \mathbf{T}$ . If we define the matrix

$$\mathbf{T} = \begin{pmatrix} 1 - 1/d & -1/d & \dots & -1/d \\ -1/d & 1 - 1/d & \ddots & \vdots \\ \vdots & \ddots & \ddots & -1/d \\ -1/d & \dots & -1/d & 1 - 1/d \end{pmatrix}$$

Then for the diagonal component of  $\mathbf{T}\mathbf{T}$  we either have entries corresponding to the dot product of

$$\begin{bmatrix} 1 - 1/d \\ -1/d \\ \vdots \\ -1/d \end{bmatrix} \cdot \begin{bmatrix} 1 - 1/d \\ -1/d \\ \vdots \\ -1/d \end{bmatrix} = (1 - 1/d)^2 + \frac{d-1}{d^2} = 1 - 1/d \quad (3.1)$$

where  $1 - 1/d$  is in the same position in the vector. The off-diagonal entries correspond to dot product of vectors where the position of the  $1 - 1/d$  terms are not matched which always gives us

$$(1 - 1/d) \times (-2/d) + (d - 2)/d^2 = -1/d \quad \square \quad (3.2)$$

Using the matrix determinant lemma where  $A$  is an invertible square matrix and  $u, v$  are column vectors

$$\det(A + uv^T) = (1 + v^T A^{-1}u) \det(A) \quad (3.3)$$

we can prove that the determinant of this matrix is zero. Express  $\mathbf{T}$  as

$$\begin{aligned} \mathbf{T} &= (\mathbf{I}_d - (1/d)\mathbf{1}_{d \times d}) \\ &= \mathbf{I}_d + \begin{bmatrix} -1/\sqrt{d} \\ \vdots \\ -1/\sqrt{d} \end{bmatrix} \begin{bmatrix} 1/\sqrt{d} & \dots & 1/\sqrt{d} \end{bmatrix} \end{aligned}$$

Thus

$$\det(\mathbf{T}) = 1 + \begin{bmatrix} 1/\sqrt{d} & \dots & -1/\sqrt{d} \end{bmatrix} \begin{bmatrix} -1/\sqrt{d} \\ \vdots \\ 1/\sqrt{d} \end{bmatrix} \quad (3.4)$$

$$= 1 - 1 = 0 \quad \square \quad (3.5)$$

### 3.2 Proof: Eigenvalues of $\mathbf{T}$ comprise of $d - 1$ 1's and one 0.

To find the eigenvalues of  $\mathbf{T}$  need to solve

$$\det(\mathbf{T} - \lambda\mathbf{I}) = 0 \quad (3.6)$$

for  $\lambda$ . Using the lemma in Equation (3.3) and  $\mathbf{T} - \lambda\mathbf{I} = A + uv^T$  where

$$A = \text{diag}(1 - \lambda) \quad u = \begin{bmatrix} -1/\sqrt{d} \\ \vdots \\ -1/\sqrt{d} \end{bmatrix} \quad v = \begin{bmatrix} 1/\sqrt{d} \\ \vdots \\ 1/\sqrt{d} \end{bmatrix} \quad (3.7)$$

we have

$$\begin{aligned} \det(\mathbf{T} - \lambda\mathbf{I}) &= (1 + v^T \text{diag}((1 - \lambda)^{-1})u)(1 - \lambda)^d \\ &= (1 - (1 - \lambda)^{-1})(1 - \lambda)^d \\ &= \left( \frac{1 - \lambda + 1}{1 - \lambda} \right) (1 - \lambda)^d \\ &= -\lambda(1 - \lambda)^{d-1}. \end{aligned} \quad (3.8)$$

Therefore the eigenvalues for  $\mathbf{T}$  are

$$\lambda_1, \lambda_2, \dots, \lambda_{d-1} = 1 \quad \lambda_d = 0 \quad \square \quad (3.9)$$

### 3.3 Proof: $\mathbf{T} = \mathbf{T}^+$

Using the SVD  $\mathbf{T}$  can be expressed as  $U\Lambda V$ . As  $\mathbf{T}$  is symmetric  $U\Lambda V = U\Lambda U$ . The pseudo inverse is

$$\begin{aligned} \mathbf{T}^+ &= U\Lambda^+U^T = \begin{bmatrix} u_1 & \cdots & u_d \end{bmatrix} \begin{bmatrix} \lambda_1^{-1} & & & \\ & \ddots & & \\ & & \lambda_{d-1}^{-1} & \\ & & & 0 \end{bmatrix} \begin{bmatrix} u_1 & \cdots & u_d \end{bmatrix} \\ &= \begin{bmatrix} u_1 & \cdots & u_d \end{bmatrix} \begin{bmatrix} 1 & & & \\ & \ddots & & \\ & & 1 & \\ & & & 0 \end{bmatrix} \begin{bmatrix} u_1 & \cdots & u_d \end{bmatrix} \\ &= \mathbf{T} \square \end{aligned}$$

This approach can also be used to solve the pseudo determinant  $\det^*(\theta\mathbf{T})$  (where  $\theta$  is a scalar) which is a product of the non-zero eigenvalues. The eigenvalues of the scaled matrix can be found solving  $\det(\theta\mathbf{T} - \lambda I) = 0$ .

$$\det(\theta\mathbf{T} - \lambda I) = (1 + v^T A^{-1}u) \det(A) \quad (3.10)$$

where

$$A = \text{diag}(\theta - \lambda) \quad u = \begin{bmatrix} -\sqrt{\theta/d} \\ \vdots \\ -\sqrt{\theta/d} \end{bmatrix} \quad v = \begin{bmatrix} \sqrt{\theta/d} \\ \vdots \\ \sqrt{\theta/d} \end{bmatrix} \quad (3.11)$$

Simplifying gives

$$\det(\theta \mathbf{T} - \lambda \mathbf{I}) = (1 + v^T A^{-1} u) \det(A) \quad (3.12)$$

$$= -\lambda(\theta - \lambda)^{d-1} \quad (3.13)$$

The eigenvalues, found by setting this expression to zero are

$$\lambda_1, \lambda_2, \dots, \lambda_{d-1} = \theta \quad \lambda_d = 0 \quad \square \quad (3.14)$$

Thus the expression

$$\det^*(2\pi w T) = (2\pi w)^{d-1}. \quad (3.15)$$

## 4 Tables

Tables 9 to 16 contain the squared bias diagnostic for the additive-log-ratio simulation experiment for each signal-to-noise ratio (SNR).

Table 9: Table of bias for the additive-log-ratio model with SNR of 0.5 and  $d$  of 45.

| Method | $\rho$ | Squared Bias      |
|--------|--------|-------------------|
| Lasso  | 0      | $0.868 \pm 0.406$ |
| Lin    | 0      | $0.821 \pm 0.39$  |
| Bates  | 0      | $0.842 \pm 0.547$ |
| VB     | 0      | $0.780 \pm 0.409$ |
| Lasso  | 0.2    | $1.160 \pm 0.164$ |
| Lin    | 0.2    | $1.167 \pm 0.444$ |
| Bates  | 0.2    | $1.047 \pm 0.612$ |
| VB     | 0.2    | $1.022 \pm 0.751$ |
| Lasso  | 0.4    | $1.873 \pm 0.587$ |
| Lin    | 0.4    | $2.096 \pm 0.825$ |
| Bates  | 0.4    | $1.739 \pm 0.975$ |
| VB     | 0.4    | $2.146 \pm 1.486$ |

Table 10: Table of bias for the additive-log-ratio model with SNR of 0.5 and  $d$  of 200.

| Method | $\rho$ | Squared Bias      |
|--------|--------|-------------------|
| Lasso  | 0      | $1.386 \pm 0.466$ |
| Lin    | 0      | $1.579 \pm 0.465$ |
| Bates  | 0      | $1.201 \pm 0.807$ |
| VB     | 0      | $1.461 \pm 0.511$ |
| Lasso  | 0.2    | $2.010 \pm 0.719$ |
| Lin    | 0.2    | $2.477 \pm 0.790$ |
| Bates  | 0.2    | $1.764 \pm 1.425$ |
| VB     | 0.2    | $2.070 \pm 0.624$ |
| Lasso  | 0.4    | $3.041 \pm 0.979$ |
| Lin    | 0.4    | $4.008 \pm 1.359$ |
| Bates  | 0.4    | $2.798 \pm 2.226$ |
| VB     | 0.4    | $4.354 \pm 2.960$ |

Table 11: Table of bias for the additive-log-ratio model with SNR of 0.83 and  $d$  of 45.

| Method | $\rho$ | Squared Bias      |
|--------|--------|-------------------|
| Lasso  | 0      | $0.313 \pm 0.136$ |
| Lin    | 0      | $0.297 \pm 0.123$ |
| Bates  | 0      | $0.183 \pm 0.179$ |
| VB     | 0      | $0.281 \pm 0.161$ |
| Lasso  | 0.2    | $0.409 \pm 0.164$ |
| Lin    | 0.2    | $0.390 \pm 0.161$ |
| Bates  | 0.2    | $0.313 \pm 0.259$ |
| VB     | 0.2    | $0.233 \pm 0.119$ |
| Lasso  | 0.4    | $0.702 \pm 0.111$ |
| Lin    | 0.4    | $0.757 \pm 0.342$ |
| Bates  | 0.4    | $0.581 \pm 0.396$ |
| VB     | 0.4    | $0.397 \pm 0.182$ |

Table 12: Table of bias for the additive-log-ratio model with SNR of 0.83 and  $d$  of 200.

| Method | $\rho$ | Squared Bias      |
|--------|--------|-------------------|
| Lasso  | 0      | $0.617 \pm 0.209$ |
| Lin    | 0      | $0.734 \pm 0.257$ |
| Bates  | 0      | $0.361 \pm 0.307$ |
| VB     | 0      | $0.531 \pm 0.047$ |
| Lasso  | 0.2    | $0.808 \pm 0.306$ |
| Lin    | 0.2    | $0.973 \pm 0.336$ |
| Bates  | 0.2    | $0.361 \pm 0.346$ |
| VB     | 0.2    | $0.687 \pm 0.240$ |
| Lasso  | 0.4    | $1.55 \pm 0.459$  |
| Lin    | 0.4    | $1.972 \pm 0.518$ |
| Bates  | 0.4    | $0.700 \pm 0.518$ |
| VB     | 0.4    | $1.017 \pm 0.569$ |

Table 13: Table of bias for the additive-log-ratio model with SNR of 1.67 and  $d$  of 45.

| Method | $\rho$ | Squared Bias      |
|--------|--------|-------------------|
| Lasso  | 0      | $0.118 \pm 0.061$ |
| Lin    | 0      | $0.122 \pm 0.045$ |
| Bates  | 0      | $0.041 \pm 0.043$ |
| VB     | 0      | $0.081 \pm 0.044$ |
| Lasso  | 0.2    | $0.079 \pm 0.041$ |
| Lin    | 0.2    | $0.075 \pm 0.036$ |
| Bates  | 0.2    | $0.035 \pm 0.037$ |
| VB     | 0.2    | $0.101 \pm 0.048$ |
| Lasso  | 0.4    | $0.165 \pm 0.077$ |
| Lin    | 0.4    | $0.176 \pm 0.066$ |
| Bates  | 0.4    | $0.043 \pm 0.046$ |
| VB     | 0.4    | $0.086 \pm 0.044$ |

Table 14: Table of bias for the additive-log-ratio model with SNR of 1.67 and  $d$  of 200.

| Method | $\rho$ | Squared Bias      |
|--------|--------|-------------------|
| Lasso  | 0      | $0.141 \pm 0.061$ |
| Lin    | 0      | $0.131 \pm 0.016$ |
| Bates  | 0      | $0.059 \pm 0.016$ |
| VB     | 0      | $0.174 \pm 0.014$ |
| Lasso  | 0.2    | $0.187 \pm 0.006$ |
| Lin    | 0.2    | $0.218 \pm 0.005$ |
| Bates  | 0.2    | $0.100 \pm 0.001$ |
| VB     | 0.2    | $0.188 \pm 0.003$ |
| Lasso  | 0.4    | $0.257 \pm 0.010$ |
| Lin    | 0.4    | $0.287 \pm 0.010$ |
| Bates  | 0.4    | $0.134 \pm 0.065$ |
| VB     | 0.4    | $0.204 \pm 0.001$ |



Table 15: Table of bias for the additive-log-ratio model with SNR of 2.5 and  $d$  of 45.

| Method | $\rho$ | Squared Bias      |
|--------|--------|-------------------|
| Lasso  | 0      | $0.051 \pm 0.022$ |
| Lin    | 0      | $0.052 \pm 0.020$ |
| Bates  | 0      | $0.020 \pm 0.022$ |
| VB     | 0      | $0.077 \pm 0.029$ |
| Lasso  | 0.2    | $0.039 \pm 0.185$ |
| Lin    | 0.2    | $0.037 \pm 0.017$ |
| Bates  | 0.2    | $0.019 \pm 0.020$ |
| VB     | 0.2    | $0.097 \pm 0.027$ |
| Lasso  | 0.4    | $0.107 \pm 0.032$ |
| Lin    | 0.4    | $0.176 \pm 0.066$ |
| Bates  | 0.4    | $0.043 \pm 0.041$ |
| VB     | 0.4    | $0.118 \pm 0.049$ |

Table 16: Table of bias for the additive-log-ratio model with SNR of 2.5 and  $d$  of 200.

| Method | $\rho$ | Squared Bias      |
|--------|--------|-------------------|
| Lasso  | 0      | $0.062 \pm 0.061$ |
| Lin    | 0      | $0.059 \pm 0.021$ |
| Bates  | 0      | $0.044 \pm 0.054$ |
| VB     | 0      | $0.061 \pm 0.001$ |
| Lasso  | 0.2    | $0.086 \pm 0.028$ |
| Lin    | 0.2    | $0.099 \pm 0.014$ |
| Bates  | 0.2    | $0.014 \pm 0.001$ |
| VB     | 0.02   | $0.131 \pm 0.002$ |
| Lasso  | 0.4    | $0.121 \pm 0.042$ |
| Lin    | 0.4    | $0.134 \pm 0.043$ |
| Bates  | 0.4    | $0.026 \pm 0.024$ |
| VB     | 0.4    | $0.175 \pm 0.002$ |

## 5 Figures

Figure S2 is the full DAG for the CAVI-MC model. Figures S3 to S5 are the ROC curves for the CAVI-MC in the simulation study at signal-to-noise ratio of 0.83 and 1.67, for  $d = 45$  and  $d = 200$ . The frequentist compositional approaches (lasso, symmetric alr, two-stage log-ratio lasso and selbal) are each represented by a dot. The ROC curve illustrates the true positive and false positive rate when thresholding  $\mathbb{E}_q[\boldsymbol{\xi}|\mathbf{y}] > u$  at decreasing values of  $u$ . The CAVI-MC purple dot identifies thresholding for feature selection at  $u = 0.5$ .

Figures S6 and S7 are the plots of the ELBO for each CAVI-MC model applied to the data from the “Know your Heart” cross-sectional study of cardiovascular disease.

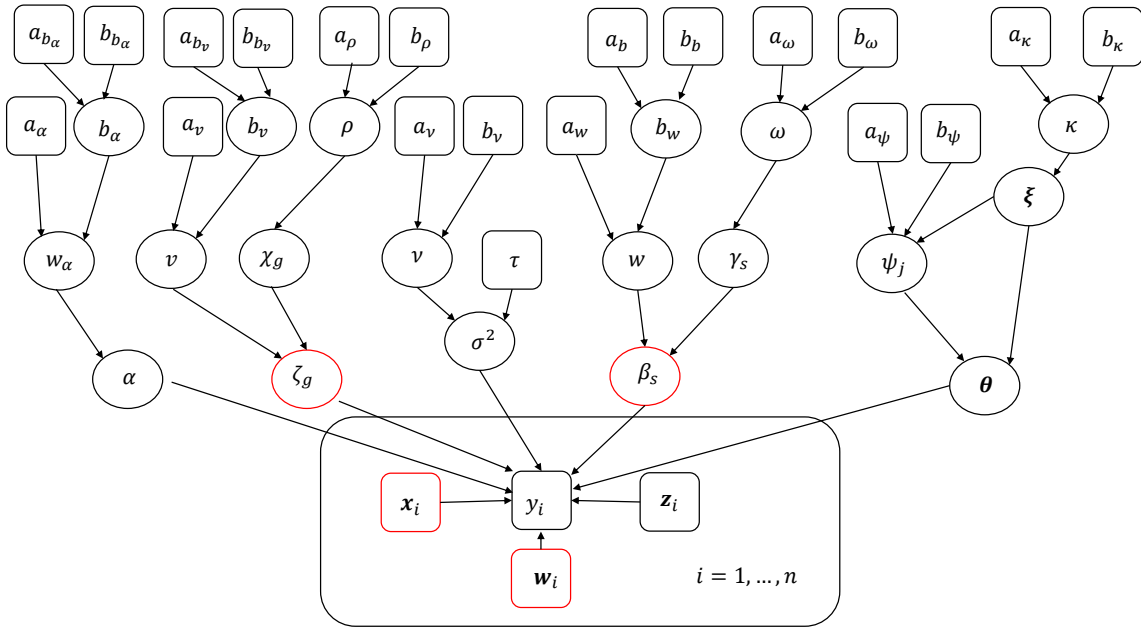

Figure S2: The full DAG of the CAVI-MC model. A square block indicates an element of the model which is fixed; either data via the design matrix or the response, or a hyperparameter of the hyperprior. A circle indicates a random element in the model. A red outline at the lowest level of the DAG highlights a parameter or design matrix omitted in the simulation study. Vectors are in bold.

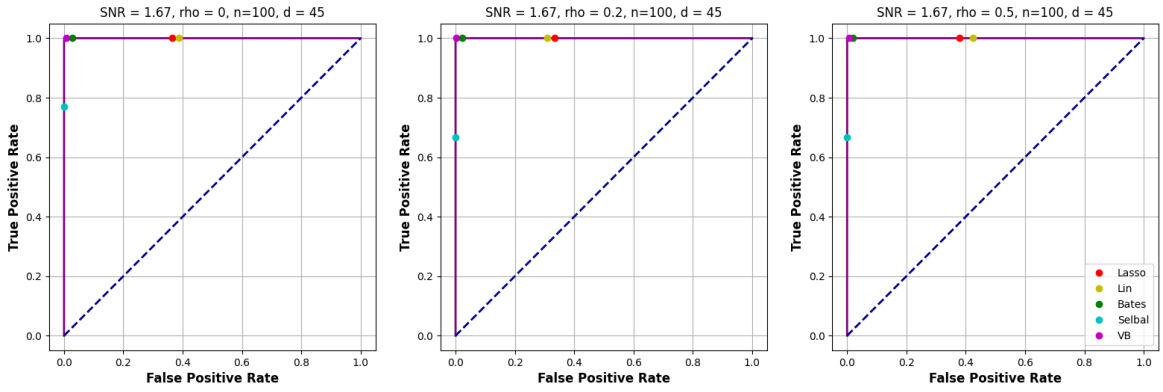

Figure S3: Plot of the ROC curves for the CAVI-MC for a SNR of 1.67 for each value of  $\rho$  for  $d = 45$ .

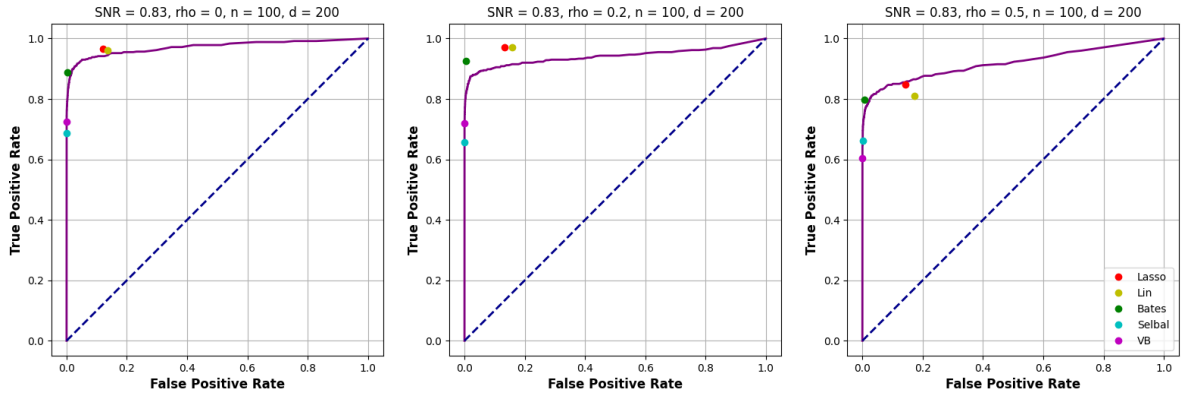

Figure S4: Plot of the ROC curves for the CAVI-MC for a SNR of 0.83 for each value of  $\rho$  for  $d = 200$ .

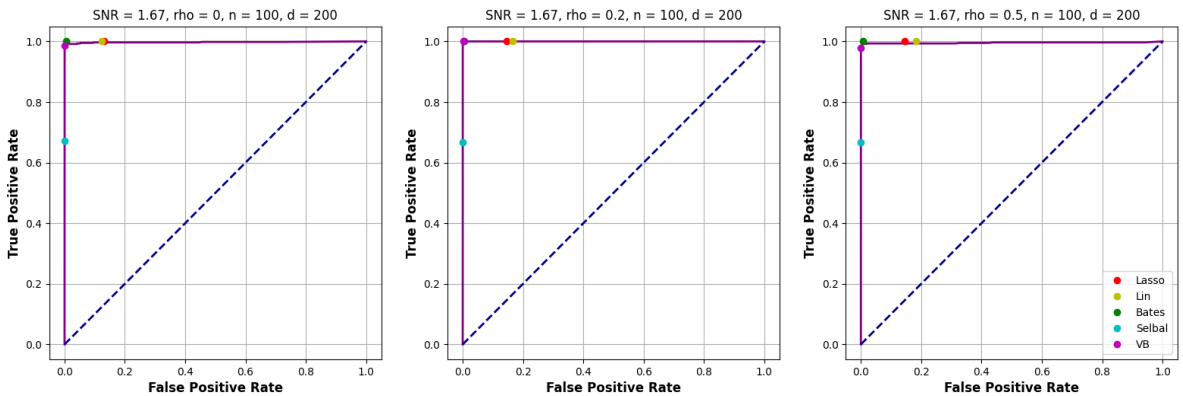

Figure S5: Plot of the ROC curves for the CAVI-MC for a SNR of 1.67 for each value of  $\rho$  for  $d = 200$ .

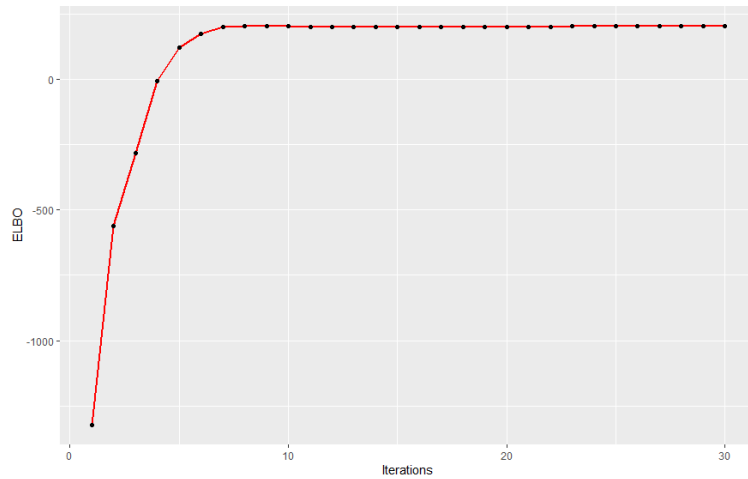

Figure S6: Plot of the ELBO against iterations for the CAVI-MC applied to the “Know Your Heart” data set with the microbiome grouped at the genus level. 30 iterations are performed, with 30,000 between state space moves by the RJMCMC after 4 iterations. The approximate straight line after only 7 iterations implies that the model has reached convergence. Despite the MCMC component removing the monotonic properties of the ELBO, the fluctuations are relatively small.

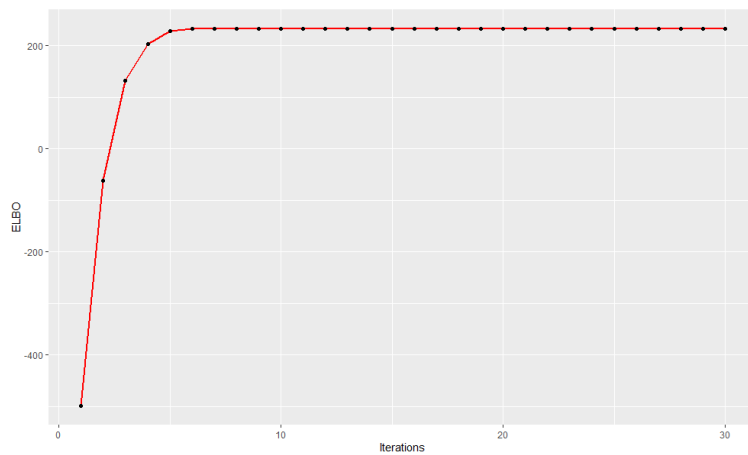

Figure S7: Plot of the ELBO against iterations for the CAVI-MC applied to the “Know Your Heart” data set with the microbiome grouped at the phylum level. 30 iterations are performed, with 30,000 between state space moves by the RJMCMC after 4 iterations. The approximate straight line after only 5 iterations implies that the model has reached convergence. Despite the MCMC component removing the monotonic properties of the ELBO, the fluctuations are relatively small.
